# Supplementary material for: How stress, discrimination, acculturation and the gut microbiome affect depression, anxiety and sleep among Chinese and Korean immigrants in the USA: a cross-sectional pilot study protocol
Source: PubMed Central journal article supplement — BMJ Open. 2021 Jul 21;11(7):e047281. doi: 10.1136/bmjopen-2020-047281 (PMC8296781; doi:10.1136/bmjopen-2020-047281), 2021-07-21
Supplement: bmjopen-2020-047281.draft_revisions.pdf [file bmjopen-2020-047281.draft_revisions.pdf]

# BMJ Open

BMJ Open is committed to open peer review. As part of this commitment we make the peer review history of every article we publish publicly available.

When an article is published we post the peer reviewers' comments and the authors' responses online. We also post the versions of the paper that were used during peer review. These are the versions that the peer review comments apply to.

The versions of the paper that follow are the versions that were submitted during the peer review process. They are not the versions of record or the final published versions. They should not be cited or distributed as the published version of this manuscript.

BMJ Open is an open access journal and the full, final, typeset and author-corrected version of record of the manuscript is available on our site with no access controls, subscription charges or pay-per-view fees (<http://bmjopen.bmj.com>).

If you have any questions on BMJ Open's open peer review process please email [info.bmjopen@bmj.com](mailto:info.bmjopen@bmj.com)

# BMJ Open

## How Stress, Discrimination, Acculturation, and the Gut Microbiome Affect Depression, Anxiety, and Sleep among Chinese and Korean Immigrants in the United States: A Cross-Sectional Study Protocol

|                               |                                                                                                                                                                                                                                                                                                                                                                                                                                                                                                                                                                                                      |
|-------------------------------|------------------------------------------------------------------------------------------------------------------------------------------------------------------------------------------------------------------------------------------------------------------------------------------------------------------------------------------------------------------------------------------------------------------------------------------------------------------------------------------------------------------------------------------------------------------------------------------------------|
| Journal:                      | <i>BMJ Open</i>                                                                                                                                                                                                                                                                                                                                                                                                                                                                                                                                                                                      |
| Manuscript ID                 | bmjopen-2020-047281                                                                                                                                                                                                                                                                                                                                                                                                                                                                                                                                                                                  |
| Article Type:                 | Protocol                                                                                                                                                                                                                                                                                                                                                                                                                                                                                                                                                                                             |
| Date Submitted by the Author: | 24-Nov-2020                                                                                                                                                                                                                                                                                                                                                                                                                                                                                                                                                                                          |
| Complete List of Authors:     | Kim, Sangmi; Emory University Nell Hodgson Woodruff School of Nursing,<br>Zhang, Wenhui; Emory University, School of Nursing<br>Pak, Victoria; Emory University Nell Hodgson Woodruff School of Nursing<br>Aqua, Jasmine; Rollins School of Public Health<br>Hertzberg, Vicki ; Emory University Nell Hodgson Woodruff School of Nursing<br>Spahr, Chandler ; University of California Riverside, Department of Psychology<br>Slavich, George; University of California Los Angeles, Psychiatry and Biobehavioral Sciences<br>Bai, Jinbing; Emory University Nell Hodgson Woodruff School of Nursing |
| Keywords:                     | PUBLIC HEALTH, SOCIAL MEDICINE, MENTAL HEALTH                                                                                                                                                                                                                                                                                                                                                                                                                                                                                                                                                        |
|                               |                                                                                                                                                                                                                                                                                                                                                                                                                                                                                                                                                                                                      |

SCHOLARONE™  
Manuscripts

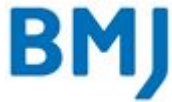

I, the Submitting Author has the right to grant and does grant on behalf of all authors of the Work (as defined in the below author licence), an exclusive licence and/or a non-exclusive licence for contributions from authors who are: i) UK Crown employees; ii) where BMJ has agreed a CC-BY licence shall apply, and/or iii) in accordance with the terms applicable for US Federal Government officers or employees acting as part of their official duties; on a worldwide, perpetual, irrevocable, royalty-free basis to BMJ Publishing Group Ltd ("BMJ") its licensees and where the relevant Journal is co-owned by BMJ to the co-owners of the Journal, to publish the Work in this journal and any other BMJ products and to exploit all rights, as set out in our [licence](#).

The Submitting Author accepts and understands that any supply made under these terms is made by BMJ to the Submitting Author unless you are acting as an employee on behalf of your employer or a postgraduate student of an affiliated institution which is paying any applicable article publishing charge ("APC") for Open Access articles. Where the Submitting Author wishes to make the Work available on an Open Access basis (and intends to pay the relevant APC), the terms of reuse of such Open Access shall be governed by a Creative Commons licence – details of these licences and which [Creative Commons](#) licence will apply to this Work are set out in our licence referred to above.

Other than as permitted in any relevant BMJ Author's Self Archiving Policies, I confirm this Work has not been accepted for publication elsewhere, is not being considered for publication elsewhere and does not duplicate material already published. I confirm all authors consent to publication of this Work and authorise the granting of this licence.

1  
2  
3 **How Stress, Discrimination, Acculturation, and the Gut Microbiome Affect Depression,**  
4  
5 **Anxiety, and Sleep among Chinese and Korean Immigrants in the United States:**  
6  
7 **A Cross-Sectional Study Protocol**  
8  
9

10  
11 Sangmi Kim, PhD, MPH, RN <sup>1</sup>, Wenhui Zhang, PhD, MSc, RN <sup>1,2</sup>, Victoria Pak, PhD, RN, MS,  
12  
13 MTR, FAAN <sup>1</sup>, Jasmine Ko Aqua, MPH <sup>3</sup>, Vicki Stover Hertzberg, PhD, FASA, P.Stat.<sup>1,2</sup>,  
14  
15 Chandler M. Spahr, MA <sup>4</sup>, George M. Slavich, PhD <sup>5</sup>, Jinbing Bai, PhD, RN, FAAN <sup>1,6\*</sup>  
16  
17

18  
19  
20 <sup>1</sup> Nell Hodgson Woodruff School of Nursing, Emory University, Atlanta, GA, USA  
21

22  
23 <sup>2</sup> Center for Data Science, Nell Hodgson Woodruff School of Nursing, Emory University,  
24  
25 Atlanta, GA, USA  
26

27  
28 <sup>3</sup> Department of Epidemiology, Rollins School of Public Health, Emory University, Atlanta, GA,  
29  
30 USA  
31

32  
33 <sup>4</sup> Department of Psychology, University of California, Riverside, CA, USA  
34

35  
36 <sup>5</sup> Cousins Center for Psychoneuroimmunology and Department of Psychiatry and Biobehavioral  
37  
38 Sciences, University of California, Los Angeles, CA, USA  
39

40  
41 <sup>6</sup> Winship Cancer Institute, Emory University, Atlanta, GA, USA  
42

43  
44 **\*Correspondence:** Jinbing Bai, PhD, RN, FAAN, Nell Hodgson Woodruff School of Nursing,  
45  
46 Emory University, 1520 Clifton Road NE, Atlanta, GA 30322. Phone: +1 404-727-2466. Email:  
47  
48 [jinbing.bai@emory.edu](mailto:jinbing.bai@emory.edu)  
49

50  
51  
52  
53 **Keywords (MeSH Terms):** Stress, Psychological; Racism; Acculturation; Gastrointestinal  
54  
55 Microbiome; Mental Health  
56

1  
2  
3 **Word count:** 4,620 words  
4  
5  
6  
7

8 **Funding:** This study was supported by the Bidirectional Global Health Disparities Research  
9  
10 Award at Emory University (S. K. and J. B.) and National Institute of Health/National Institute  
11  
12 of Nursing Research (1K99NR017897-01, 4R00NR017897-03, J. B.). G. M. S. was supported by  
13  
14 a Society in Science—Branco Weiss Fellowship, NARSAD Young Investigator Grant #23958  
15  
16 from the Brain & Behavior Research Foundation, and National Institutes of Health grant K08  
17  
18 MH103443.  
19  
20  
21  
22  
23  
24  
25  
26  
27  
28  
29  
30  
31  
32  
33  
34  
35  
36  
37  
38  
39  
40  
41  
42  
43  
44  
45  
46  
47  
48  
49  
50  
51  
52  
53  
54  
55  
56  
57  
58  
59  
60

## Psychosocial Determinants, Gut Microbiome, &amp; Health

**Abstract**

**Introduction:** Although a considerable proportion of Asians in the United States experience depression, anxiety, and poor sleep, such health issues have been underestimated due to the model minority myth about Asians, the stigma attached to mental health, lower rates of seeking treatment, and a shortage of culturally tailored mental health services. Indeed, despite emerging evidence of the links between psychosocial risk factors, the gut microbiome, and depression, anxiety, and sleep quality, very few studies examined such relationships in Chinese and Korean immigrants in the U.S. The purpose of this study is to address this issue by (1) testing the usability and feasibility of the study's multilingual survey measures and biospecimen collection procedure among Chinese and Korean immigrants in the U.S., and (2) examining how stress, discrimination, acculturation, and the gut microbiome are associated with depression, anxiety, and sleep quality in this population.

**Methods and Analysis:** This is a cross-sectional study among 1st and 2nd generations of adult Chinese and Korean immigrants in the greater Atlanta area (Georgia, U.S.). We will collect (1) gut microbiome samples and (2) data on psychosocial risk factors, depression, anxiety, and sleep disturbance using a battery of online surveys with validated scales in English, Mandarin Chinese, and Korean. We aim to recruit 60 participants (30 Chinese and 30 Korean). We will profile participants' gut microbiome using 16S rRNA V3-V4 sequencing data, which will be analyzed by QIIME 2. Associations of the gut microbiome and psychosocial factors with depression, anxiety, and sleep disturbance will be analyzed using descriptive and inferential statistics, including linear regression.

1  
2  
3 **Ethics and Dissemination:** This study has been approved by the Institutional Review Board at  
4  
5 XX University where the investigators are affiliated. Results will be made available to Chinese  
6  
7 and Korean community members, the funder, and broad scientific societies and researchers.  
8  
9

### 10 **Strengths and Limitations**

- 12 • This study is the first to examine biological and psychosocial mechanisms underlying  
13 mental health and sleep quality among Chinese and Korean immigrants.  
14
- 15 • The study will collect data among Asians in the U.S., who have been historically  
16 underrepresented in biomedical research.  
17
- 18 • The study is timely, as the COVID-19 pandemic increased racial discrimination and  
19 stress among Asians in the U.S.  
20
- 21 • The study uses a state-of-the-art measure of lifetime stress exposure (i.e., STRAIN) and  
22 several scales tailored to Asians.  
23
- 24 • The cross-sectional design of the study will limit the testing of causal associations but set  
25 the stage for future longitudinal research.  
26
- 27
- 28
- 29
- 30
- 31
- 32
- 33
- 34
- 35
- 36
- 37
- 38
- 39
- 40
- 41
- 42
- 43
- 44
- 45
- 46
- 47
- 48
- 49
- 50
- 51
- 52
- 53
- 54
- 55
- 56
- 57
- 58
- 59
- 60

## Introduction

Asians are the fastest-growing racial group in the United States,<sup>1</sup> with Chinese (23%) and Koreans (9%) combined representing the largest subgroup of Asians. The increasing size of the Asian population nationwide calls for more attention to be paid to the unique health needs of this population, which has been historically underestimated and underrepresented, partly because of the “model minority myth” that characterizes Asians as being relatively successful with few problems.<sup>2</sup> However, Asian Americans experience many mental health problems including depression and anxiety in high proportions, making this topic an important public health priority, especially during the current COVID-19 pandemic.

Although depressive and anxiety disorders are the most common and debilitating psychiatric illnesses in the U.S. adult population,<sup>3,4</sup> the literature investigating these illnesses among Asians is limited.<sup>5</sup> This has occurred despite the fact that depression is the most frequently diagnosed mental disorder in Asian Americans. The pooled prevalence rate of depression ranges from 26.9% to 35.6%,<sup>5</sup> and the lifetime prevalence is estimated to be 9.1%.<sup>6</sup> Asian Americans, as compared to their White peers, tend to manifest more prevalent, persistent, and ongoing depressive symptoms.<sup>5-7</sup> This is a critical point, as depression is the leading cause of disability worldwide and can lead to more severe health consequences, including chronic physical health problems<sup>8,9</sup> and suicide. In fact, suicide is the leading cause of death for Asian Americans aged 15 to 24 years.<sup>10</sup> Additionally, anxiety disorders (panic disorder, agoraphobia without panic disorder, social phobia, generalized anxiety disorder, and post-traumatic stress disorder) are experienced among 10.2% of Asian Americans.<sup>6</sup> Moreover, due to the stigma attached to mental health conditions and the lack of culturally competent mental health services, Asian Americans are less likely than their White peers to ask for help and seek treatment,<sup>4,8</sup>



1  
2  
3 which contribute to the racial and ethnic disparities in mental health outcomes that are evident in  
4  
5 the U.S. for Asian Americans.  
6

7  
8         Understanding depression and anxiety among Asian immigrants is complicated by the  
9  
10 fact that their mental health is determined by multiple factors, including chronic stress exposure,  
11  
12 racial discrimination, and level of acculturation.<sup>5 7 11</sup> It has been reported that the more Asian  
13  
14 Americans are exposed to discrimination and acculturative life stress, the more likely they are to  
15  
16 experience depression and anxiety.<sup>12</sup> Asian Americans experience racial discrimination on  
17  
18 multiple levels (i.e., cultural, structural, interpersonal, and internalized).<sup>13-15</sup> Moreover, racial  
19  
20 discrimination and aggression toward Asians has substantially increased during the COVID-19  
21  
22 pandemic. Relative to White, Black, and Hispanic peers, for example, Asian Americans are more  
23  
24 likely to report that since the COVID-19 pandemic, people acted as if they were uncomfortable  
25  
26 around them (39%), that they have been subjected to slurs or jokes (31%), and that they have  
27  
28 feared someone might threaten or physically attack them (26%).<sup>16</sup> Moreover, 60% of Asian  
29  
30 immigrants, including those with high educational attainment, experience acculturative stress  
31  
32 associated with learning and fitting into a new culture, concerns about legal status, cultural  
33  
34 conflicts, and language barriers.<sup>17</sup>  
35  
36  
37  
38  
39

40         Given the complexity of the psychosocial determinants underlying depression and  
41  
42 anxiety, it is challenging to identify Asian Americans at high risk of developing these mental  
43  
44 health disorders, particularly given that they are more reluctant to disclose their mental health  
45  
46 status to others.<sup>5 17</sup> Thus far, a few biomarkers have been used to predict depression, including  
47  
48 cytokines and inflammatory markers, oxidative stress markers, endocrine markers, energy  
49  
50 balance hormones, genetic/epigenetic factors, and structural and functional brain imaging.<sup>18</sup>  
51  
52  
53  
54 Emerging evidence suggests that the gut microbiome also plays a critical role in human mental  
55  
56  
57  
58  
59  
60

## Psychosocial Determinants, Gut Microbiome, &amp; Health

1  
2  
3 health via the microbiome-gut-brain axis.<sup>19</sup> The gut microbiome is the collection of all genomes  
4  
5 of the microbes in the human gastrointestinal tract.<sup>20</sup> The human gut hosts tens of trillions of  
6  
7 microbes, representing 500 species on average.<sup>21 22</sup> Notably, it is heavily influenced by an  
8  
9 individual's sociodemographic characteristics, changes in diet, lifestyle, stress, and geographic  
10  
11 environment, all of which represent significant risk factors for depression and anxiety among  
12  
13 Asian immigrants.<sup>23 24</sup> More specifically, migration from non-western nations to the U.S. is  
14  
15 associated with a loss in the gut microbial diversity and function in a manner that may predispose  
16  
17 Asian immigrants to high risk of metabolic diseases and mental disorders.<sup>23</sup> Therefore,  
18  
19 subsequent changes in the gut microbiome (e.g., diversity and function) after migration provide a  
20  
21 unique opportunity to study how living environment in the U.S. represents an external stimulus  
22  
23 that affects immigrants' mental health in the context of stress, discrimination, and  
24  
25 acculturation.<sup>23 25 26</sup>  
26  
27  
28  
29

30  
31 Finally, when exploring the impact of psychosocial determinants and the gut microbiome on  
32  
33 mental health, it is critical to address sleep quality.<sup>27</sup> Asian Americans are more likely to report  
34  
35 short sleep duration than their White peers (33% vs 28%).<sup>28</sup> Sleep disturbance is one of the most  
36  
37 prominent symptoms experienced by those with depression and anxiety disorder, and is  
38  
39 incorporated into their diagnostic criteria and definitions.<sup>29-31</sup> Moreover, chronic stress is most  
40  
41 frequently manifested as changes in sleep patterns or sleep disturbance.<sup>32</sup> Daily racial  
42  
43 microaggressions have been associated with poorer sleep quality and shorter sleep duration the  
44  
45 following day among Asian Americans.<sup>33</sup> Additionally, the gut microbiome has been associated  
46  
47 with sleep disturbance and metabolic disorders.<sup>34 35</sup> Considered together, therefore, it is critical to  
48  
49 examine psychosocial and biological pathways that might underlie depression, anxiety, and sleep  
50  
51  
52  
53  
54  
55  
56  
57  
58  
59  
60

1  
2  
3 disturbance in Asian Americans in the context of migration and acculturation among Asian  
4  
5 immigrants in the U.S.  
6

## 7 **Present Study**

8  
9  
10 The goal of the present study is to study psychosocial and biological mechanisms of  
11  
12 depression, anxiety, and sleep disturbance in order to help promote early prevention and  
13  
14 personalized treatment for these conditions among Asian immigrants who commonly  
15  
16 underutilize mental health services. The work is guided by conceptual framework presented in  
17  
18 **Figure 1**. In conducting this research, we have two primary aims: (1) To test the usability and  
19  
20 feasibility of the study's multilingual survey measures and biospecimen collection among  
21  
22 Chinese and Korean immigrants in the U.S.; and (2) to collect pilot data for a larger study to  
23  
24 examine the role of psychosocial determinants of health and the gut microbiome in depression,  
25  
26 anxiety, and sleep disturbance among this population.  
27  
28  
29

## 30 **Methods**

### 31 **Study Design and Participants**

32  
33  
34 An observational cross-sectional study design will be used. Our inclusion criteria for the  
35  
36 sample population are: (1) aged 18 years or older; (2) self-identify as Chinese or Korean; (3) live  
37  
38 in the greater Atlanta area in Georgia, U.S.; and (4) can read and write English, Mandarin  
39  
40 Chinese, or Korean. Because this study aims to sample 1st and 2nd generation Chinese and  
41  
42 Korean immigrants, we define 1st generation immigrants as those who are foreign-born living in  
43  
44 the U.S., regardless of the duration and purpose of residence in the U.S., and we define 2nd  
45  
46 generation immigrants as those who are US-born living in the U.S. The exclusion criteria include  
47  
48 pregnant woman, as they undergo considerable psychosocial and biological changes during  
49  
50 pregnancy that can affect their physical and mental health status. We will sample a total of 60  
51  
52  
53  
54  
55  
56  
57  
58  
59  
60

## Psychosocial Determinants, Gut Microbiome, & Health

1  
2  
3 participants, including 30 Chinese and 30 Korean. As a pilot study's sample size, 24-40 is  
4  
5 suggested to help obtain optimal sample size for both pilot and main trials.<sup>36 37</sup>  
6  
7

### **Recruitment**

8  
9  
10 First, we will recruit potential participants through online and offline study  
11  
12 announcements on social media (e.g., Twitter, Facebook), craigslist, ResearchMatch, Chinese  
13  
14 and Korean online communities, websites, blogs, and flyers. Second, we will solicit help from  
15  
16 gatekeepers in the community (e.g., churches, clinics, immigrant associations) who will refer  
17  
18 interested individuals to the research team. Many studies have suggested collaboration with  
19  
20 gatekeepers as one of the most effective way to reach out to Asian populations in the U.S.<sup>38</sup>  
21  
22  
23

### **Patient and Public Involvement**

24  
25  
26 We have established an advisory board comprised of not only academics with expertise  
27  
28 in immigrant populations and mental health, but also community members from churches and  
29  
30 clinics. The community members are Chinese or Korean themselves and serve Chinese or  
31  
32 Koreans in the Greater Atlanta area. The goal of the advisory board is to demonstrate and  
33  
34 improve the research team's engagement with and accessibility to the target population.  
35  
36  
37

### **Data Collection**

38  
39  
40 First, when potential participants contact the research team directly or via referral, our  
41  
42 research staff will contact them back and make an appointment to screen their eligibility and  
43  
44 obtain consent to participate in the study. To accomplish this, we have hired and trained  
45  
46 culturally matched research staff who are fluent in English, Chinese, or Korean to perform the  
47  
48 consent process in the participant's preferred language. Second, upon obtaining participants'  
49  
50 informed consent and agreement to participate in the study, the research team will send an online  
51  
52 survey link via email. Participants will administer the survey in their preferred language. During  
53  
54  
55  
56  
57  
58  
59  
60

1  
2  
3 the survey, participants will provide their name, mailing address, phone number, and email  
4 address. Participant names and mailing addresses will be used to ship gut microbiome data  
5 collection kits, which will include pictorial and written instructions in English, Mandarin  
6 Chinese, or Korean. Compensation for participating will be provided after completing the study.  
7  
8  
9  
10  
11

12 Consistent with ethical guidelines, participants will be allowed to opt-out of parts of the  
13 data collection—either the online survey or specimen collection—and continue with other parts  
14 of the protocol as they wish. If a participant does opt out, they will be encouraged to provide a  
15 reason so we can better understand the situation. Their feedback on the usability of the study  
16 methods will help the research team modify and tailor the current data collection procedure  
17 further to Chinese and Korean immigrants for future research. If participants withdraw their  
18 consent, or if the research team learns that a participant does not meet the inclusion or exclusion  
19 criteria during the study, data collection will be stopped, and all collected biological material and  
20 data will be destroyed.  
21  
22  
23  
24  
25  
26  
27  
28  
29  
30  
31  
32

### 33 **Self-reported Measures and their Translation**

34  
35 This study will use the battery of validated instruments described in **Table 1**. This battery  
36 will include the Demographics Short Form (DSF), Suinn-Lew Self Identity Acculturation Scale  
37 (SL-ASIA), Acculturative Stress Scale, Subtle and Blatant Racism Scale for Asian Americans  
38 (SABR-A<sup>2</sup>), Stress and Adversity Inventory for Adults (Adult STRAIN), Pandemic Stress Index  
39 (PSI), PROMIS Short Form – Depression, PROMIS Short Form–Anxiety, Pittsburgh Sleep  
40 Quality Index (PSQI), and PrimeScreen, a brief dietary screening tool. All these instruments  
41 have already been validated and widely used in English.  
42  
43  
44  
45  
46  
47  
48  
49  
50

51 For measures that have not yet been translated into Chinese and/or Korean, we contacted  
52 the instrument developers to obtain permission to use and translate them. We translated SABR-  
53  
54  
55  
56  
57  
58  
59  
60

## Psychosocial Determinants, Gut Microbiome, &amp; Health

1  
2  
3 A<sup>2</sup>, Adult STRAIN, PSI, and PrimeScreen into Mandarin Chinese and Korean following the  
4  
5 guideline of cultural translation and adaptation of instruments from the World Health  
6  
7 Organization, which includes: forward translation, expert panel back translation, pre-testing and  
8  
9 cognitive interviewing, and final version.<sup>39</sup> Our instrument translation team includes three  
10  
11 research team members and one external member who were bilingual (fluent in English and  
12  
13 Mandarin Chinese or Korean) with Ph.D. degrees in nursing or sociology and extensive  
14  
15 experience with Asian immigrants, demography, mental health, and stress. Specifically, after one  
16  
17 member translated all of the instruments into Chinese or Korean versions, another member  
18  
19 translated them back into English versions. Then, both members compared the original English  
20  
21 and back-translated English versions to evaluate the quality of the translation. Discrepancies in  
22  
23 the translation and meanings were solved by consensus discussions between these two members  
24  
25 to ensure conceptual equivalence across the translations. The steps taken as part of this multi-  
26  
27 lingual survey development process is depicted in **Figure 2**.

32  
33 **DSF.** The DSF is a 27-item questionnaire used to collect participants' general  
34  
35 sociodemographic and health characteristics. The sociodemographic variables include age,  
36  
37 gender, self-identified race, marital status, living arrangement, immigration, religious belief, and  
38  
39 household income. Health-related variables include height, weight, lactose intolerance, use of  
40  
41 antibiotics and probiotics, disease history, and the use of mental health services.

44  
45 **SL-ASIA.** The original version<sup>40</sup> of the SL-ASIA is a 26-item questionnaire used to  
46  
47 assess a person's level of acculturation, specifically historical background and cultural identity.  
48  
49 We chose 5 items to measure participants' preference for food, music, custom, language  
50  
51 proficiency, and the racial composition of close friends on a 5-point Likert scale. This adapted  
52  
53 version has been used in other studies.<sup>41</sup> We will average the assigned values across the  
54  
55  
56  
57  
58  
59

1  
2  
3 questions into a total acculturation score. A higher total score indicates more Westernization or  
4  
5 acculturation.  
6

7  
8 ***Acculturative Stress Scale.*** The Acculturative Stress Scale is a 36-item questionnaire used  
9  
10 to measure acculturative stress on a 5-point Likert scale. Not counting the miscellaneous group,  
11  
12 there are six subscales assessing perceived discrimination, homesickness, perceived hate, fear,  
13  
14 stress due to change/culture shock, and guilt. In this study, an 8-item questionnaire from two  
15  
16 domains of task-oriented stress (3 items) and emotion-oriented stress (5 items) will be adopted.  
17  
18 Items for task-oriented stress include: “I feel nervous when communicating in English” and “I  
19  
20 feel uncomfortable adjusting to new foods.” Sample items for emotion-oriented stress include:  
21  
22 “Homesickness bothers me” and “I feel sad living in unfamiliar surroundings.” Acculturative  
23  
24 stress in the adapted instrument will also be measured on a 5-point Likert scale from 0 (*strongly*  
25  
26 *disagree*) to 4 (*strongly agree*). Individual scores will be summed to create a total score for each  
27  
28 domain where a task-oriented stress score can range 0–12, and an emotion-oriented stress score  
29  
30 can range 0–20. Higher scores indicate greater levels of acculturative stress. The adapted  
31  
32 instrument has shown high internal consistency for both scales tested among Korean American  
33  
34 elders (Cronbach’s  $\alpha = .73$  for task-oriented stress and  $.87$  for emotion-oriented stress).<sup>42</sup>  
35  
36  
37  
38  
39

40 ***SABR-A***<sup>2</sup>. The SABR-A is a 10-item questionnaire that asks about personal experience of  
41  
42 subtle and blatant racism.<sup>43</sup> The subtle racism subscale (4 items) refers to instances of  
43  
44 discrimination due implicitly to racial bias or stereotype (e.g., treated differently, overlooked).  
45  
46 The blatant racism subscale (4 items) refers to instances of discrimination due explicitly to racial  
47  
48 bias or stereotype (e.g., called names, commented about English proficiency). However, two out  
49  
50 of ten items will not be included in these scales because according to the instrument’s author,  
51  
52 they were developed as exploratory items. Responses are measured on a 5-point Likert scale  
53  
54  
55  
56  
57  
58  
59  
60

## Psychosocial Determinants, Gut Microbiome, &amp; Health

1  
2  
3 from 1 (*almost never*) to 5 (*almost always*). All eight items will be averaged into a total racism  
4 score, and each set of the four items will be averaged into a subtle and blatant racism score, with  
5 higher scores indicating greater perceived racism. The internal consistency of the total, subtle,  
6 and blatant racism (sub)scales tested among self-identified Asian American undergraduate  
7 students was 0.84-0.88, 0.76-0.82, and 0.77-0.82, respectively.<sup>43</sup>

14  
15 **Adult STRAIN.** The Adult STRAIN<sup>44</sup> measures a person's lifetime exposure to 55  
16 different types of acute (e.g., deaths of relatives, job loss) and chronic stressors (e.g., ongoing  
17 health, work, relationship, and financial problems). Participants' responses will be used to  
18 calculate a standard set of 20 lifetime stress exposure scores, which are based on the type of  
19 stressors experienced, when they were experienced, their primary life domain, and their core  
20 social-psychological characteristic. More specifically, this summary score data will include the  
21 following computed variables: lifetime stressor count, lifetime stressor severity, early life (before  
22 age 18) stressor count, early life (before age 18) stressor severity, adulthood stressor count,  
23 adulthood stressor severity, lifetime count of acute life events, lifetime count of chronic  
24 difficulties, lifetime severity of acute life events, lifetime count of chronic difficulties, lifetime  
25 stressor count and severity by primary life domain (i.e., housing, education, work,  
26 treatment/health, marital/partner, reproduction, financial, legal/crime, other relationships, death,  
27 life-threatening situations, possessions), and lifetime stressor count and severity by core social-  
28 psychological characteristic (i.e., interpersonal loss, physical danger, humiliation, entrapment,  
29 role change/disruption). Higher score indicates greater life stress exposure across these  
30 categories. The STRAIN has been extensively validated in relation to a variety of mental and  
31 physical health outcomes,<sup>45 46</sup> and has excellent test-retest reliability over time for the main stress  
32 exposure outcomes ( $r$ -values  $\geq 0.904$ ).<sup>47</sup>



1  
2  
3       **PSI.** The PSI<sup>48</sup> is a 3-item measure of behavior changes and stress that individuals may  
4 have experienced during the COVID-19 pandemic. The questions are: “What are you doing/did  
5 you do during COVID-19 (coronavirus)?” with a checklist of items about behaviors, like social  
6 distancing; “How much is/did COVID-19 (coronavirus) impact your day-to-day life?”; and  
7 “Which of the following are you experiencing (or did you experience) during COVID-19  
8 (coronavirus)?” with a checklist of items about emotional distress, substance use, sexual  
9 behavior, financial stress, stigma, and support.

10  
11       **PROMIS Short Form–Depression.** The 28-item PROMIS Depression Item Bank  
12 assesses negative mood (e.g., sadness, guilt), negative views of self (e.g., self-criticism,  
13 worthlessness), negative social cognition (e.g., loneliness, interpersonal alienation), and  
14 decreased positive affect and engagement (e.g., loss of interest, meaning, and purpose).<sup>49</sup> Of  
15 these 28 items, 6 items have been selected to create the PROMIS Short Form–Depression, which  
16 has high reliability and precision that is comparable to the original 28-item scale.<sup>49</sup> The 6-item  
17 scale assesses depressive symptoms over the past 7 days and has response options ranging from  
18 1 (*never*) to 5 (*always*). The raw scores will be transformed into T scores, with higher scores  
19 indicating more depressive symptoms.<sup>49</sup>

20  
21       **PROMIS Short Form–Anxiety.** The PROMIS Anxiety Item Bank assesses self-reported  
22 fear, anxious misery, hyperarousal, and somatic symptoms related to arousal.<sup>50</sup> The PROMIS  
23 Short Form–Anxiety includes six items, whose reliability and precision are high and comparable  
24 to the full item bank.<sup>50</sup> The correlation of the adult full bank with the 6-item short form is  
25 between 0.90 and 0.95. The 6 items assess anxiety symptoms over the past 7 days and have  
26 response options ranging from 1 (*never*) to 5 (*always*). The raw scores will be transformed into T  
27 scores, with higher scores indicating more severe anxiety.<sup>50</sup>

## Psychosocial Determinants, Gut Microbiome, &amp; Health

1  
2  
3 **PSQI.** The PSQI is a 10-item scale containing 19 self-rated questions. It assesses sleep  
4 quality over a 1-month time interval. The instrument evaluates both objective (e.g., how often  
5 participants wake up during the night) and subjective aspects of sleep quality (e.g., how rested  
6 they typically feel after a night of sleep). These 19 questions are combined to form seven  
7 “component” scores, each of which has a range of 0-3 points, from 0 (*no difficulty*) to 3 (*severe*  
8 *difficulty*). Then, the seven component scores are summed to create a global PSQI score, ranging  
9 from 0-21, with higher scores indicating worse sleep quality. In primary insomnia patients, the  
10 overall PSQI global score correlation was .87 for test-retest reliability.<sup>51</sup> The total score of the  
11 Korean version of PSQI showed high internal consistency (Cronbach's  $\alpha = 0.84$ ).<sup>52</sup>

12  
13  
14  
15  
16  
17  
18  
19  
20  
21  
22  
23  
24 **PrimeScreen.** The PrimeScreen is a 23-item dietary assessment questionnaire.<sup>53</sup> This  
25 self-reported measure evaluates the average frequency of consumption of specified foods and  
26 food groups, as well as 13 nutrients (e.g., vitamin and supplements) over the past 6 months.<sup>53 54</sup>  
27 Each item has five response categories: “less than once per week”, “once per week”, “2-4 times  
28 per week”, “nearly daily or daily”, or “twice or more per day”. This measure has great reliability  
29 and validity for use in adults ages 19-65 years, including excellent reproducibility ( $r = 0.70$ ) and  
30 comparability ( $r = 0.61$ ) with the Semiquantitative Food Frequency Questionnaire (SFFQ) in  
31 foods and food groups, as well as excellent reproducibility ( $r = 0.74$ ) and comparability ( $r =$   
32 0.60) with the SFFQ for nutrients.<sup>53</sup>

### 43 **Gut Microbiome**

44  
45  
46  
47 To profile the gut microbiome, we will collect fecal specimens. The sample collection  
48 will be performed as indicated in the Human Microbiome Project protocol.<sup>55</sup> Specifically, we  
49 will coach participants to use the home-based specimen collection kits to obtain fecal samples.  
50 Fecal samples will be collected using pictorial instruction. All the instructions for the sample  
51  
52  
53  
54  
55  
56  
57  
58  
59  
60

1  
2  
3 collection will be prepared in English, Mandarin Chinese, and Korean. Upon completion of the  
4  
5 specimen collection, participants will follow the packaging instructions (e.g., store in a  
6  
7 refrigerator before shipping) and then ship their samples to the Nursing Biobehavioral  
8  
9 Laboratory at XX University using pre-paid FedEx envelopes. All fecal samples will be stored at  
10  
11 a -80°C freezer until DNA extraction.  
12  
13

### 14 **DNA Extraction and Sequencing of the Gut Microbiome**

15  
16 According to the Human Microbiome Project protocol, the microbial DNA will be  
17  
18 extracted from fecal specimens using the PowerSoil isolation kit (MO BIO Laboratories,  
19  
20 Carlsbad, CA, USA). The 16S rRNA V3-V4 gene regions<sup>56 57</sup> will be extracted and sequenced.  
21  
22 16S rRNA amplicons will be generated using KAPA HiFi HotStart ReadyMix (KAPA  
23  
24 Biosystems, KK2600) and primers specific to 16S V3-V4 region of bacteria 341F (5'-  
25  
26 CCTACGGGNGGCWGCAG-3')-805R (5'-GACTACHVGGGTATCTAATCC-3'). The PCR  
27  
28 clean-up will be performed using AMPure XP beads (Beckman, A63880) and indices will be  
29  
30 attached using the Nextera XT Index kit (Illumina, FC-131-1001). Final library pools will be  
31  
32 quantitated via qPCR (Kapa Biosystems, catalog KK4824). The pooled library will be sequenced  
33  
34 on an Illumina miSeq using miSeq v3 600 cycle chemistry (Illumina, catalog MS-102-3003) at a  
35  
36 loading density of 8 pM with 20% PhiX, at PE300 reads. This process will be conducted at the  
37  
38 Integrated Genomics Core at XX University. The microbial sequencing will lead to paired-end  
39  
40 sequences for further analysis.  
41  
42  
43  
44

### 45 **Statistical Analysis**

46  
47 Prior to analysis, all data will be reviewed for quality, distributions, and missing data bias.  
48  
49 Mathematical transformations will be performed when necessary to normalize measures.  
50  
51 Descriptive statistics (e.g., Mann-Whitney U test and Fisher's exact test because of the small  
52  
53  
54  
55  
56  
57  
58  
59

## Psychosocial Determinants, Gut Microbiome, &amp; Health

sample size) will be adopted to describe participants' characteristics as well as associations between the psychosocial and biological factors and the outcome variables (anxiety, depression, and sleep disturbance).

For the gut microbiome data, 16S rRNA sequences will be analyzed to obtain microbial diversity ( $\alpha$ -diversity and  $\beta$ -diversity), taxonomic composition, and abundance analysis. QIIME 2 default parameters will be adopted to filter the sequences quality using DADA2.<sup>58 59</sup> Taxonomies will be assigned by the pre-trained classifier using Silva. Pearson or Spearman correlations will be used to determine associations among microbial diversity indices and the outcome variables. The principal coordinates analysis will also be used to visualize diversity patterns. Associations between the gut microbiome and demographics and psychosocial factors will be analyzed using microbiomes' composition.<sup>60</sup> Lastly, the linear discriminant analysis (LDA) effect size (LEfSe)<sup>61</sup> will be used to characterize the taxa differences between different levels of outcome variables: 1) Kruskal-Wallis sum-rank test will be adopted to detect features with significant differential abundance between the levels of outcome variables; 2) Wilcoxon rank-sum test will be adopted to further investigate significances of taxa through a set of pairwise tests among subclasses (e.g., psychosocial factors); and 3) LEfSe will use LDA to estimate the effect size of each differentially abundant feature. All analyses will be conducted using QIIME 2<sup>62-64</sup> and R 3.3.3. The statistical significance level will be set at  $p < 0.05$ .

**Data Storage and Security**

All of the survey data will be managed using REDCap,<sup>65</sup> which allows data errors, completeness, and validation checks to ensure maximum quality throughout. All fecal specimens will be stored in the Nursing Biobehavioral Laboratory at XX University. These specimens will only be used to address our research aims. All the survey data and specimens will be destroyed 3

1  
2  
3 years after the entire study is finished. The confidentiality of all data will be maintained within  
4  
5 legal limits.  
6

### 7 8 **Discussion** 9

10 Although numerous studies have examined risk processes associated with mental health  
11 and poor sleep in general, there is a distinct paucity of research on Asian immigrants in the U.S.,  
12 despite the fact that this population is underserved and experiences the great mental health-  
13 related disease burden in America. To address this important issue, we will conduct the present  
14 study, which will be the first to examine biological and psychosocial mechanisms underlying  
15 depression, anxiety, and sleep symptoms among Chinese and Korean immigrants in the U.S.  
16 Considering that these populations are growing quickly, we expect that our findings will help  
17 advance our knowledge on racial and ethnic differences in mental health outcomes and the  
18 biopsychosocial pathways that underlie these effects.  
19  
20  
21  
22  
23  
24  
25  
26  
27  
28  
29

30  
31 Although these associations would be important to understand at any time, we believe  
32 these issues are particularly critical to study during the COVID-19 pandemic, given the increased  
33 rates of social conflict, discrimination, and, in some cases, injustice that have been experienced  
34 by Asians in the U.S during this time. Indeed, the impact of the COVID-19 pandemic on Asian  
35 immigrants has been extensive.<sup>66</sup> Public health measures designed to curb the spread of the virus,  
36 which have included lockdown, school and business closures, and travel restrictions, have had a  
37 tremendous impact on the stress levels and mental health of the general population.<sup>67</sup> Beyond  
38 this, though, Asians living in the U.S. have been stigmatized and victimized by media coverage  
39 perpetuating the naming of the COVID-19 virus as the ‘Chinese Virus’ or ‘Kung Flu’, which has  
40 in turn lead to racial discrimination and other social threats<sup>66</sup> that have been shown to strongly  
41 affect mental and physical health.<sup>68</sup> The cumulative social stress and threat experienced by Asian  
42  
43  
44  
45  
46  
47  
48  
49  
50  
51  
52  
53  
54  
55  
56  
57  
58  
59  
60

## Psychosocial Determinants, Gut Microbiome, &amp; Health

1  
2  
3 immigrants, which include aggravated racial discrimination in addition to ongoing health,  
4 employment, and financial worries, will provide a unique opportunity to better understand how  
5 psychosocial factors and the microbiome affect mental health and sleep symptoms during a time  
6 of maximal importance and relevance.  
7  
8  
9  
10  
11

12 In assessing Asian immigrants' cumulative life stress exposure, the adult STRAIN and  
13 PSI will help capture acute and chronic stressors of participants who have been going through  
14 the pandemic for an extended period of time. Importantly, some of the measures we have  
15 selected are tailored to Asian populations, which will enable us to collect more valid and reliable  
16 data that are reflective of Asians' lived experiences, including racial discrimination and  
17 acculturation. These culturally adapted measures will yield a unique and timely perspective on  
18 mental health and sleep outcomes in Asian immigrants. Looking forward, we expect this study to  
19 provide important data that can in turn be used to inform the development of a larger longitudinal  
20 study aimed at investigating causal relations between social and biological determinants of  
21 health, and mental health and sleep symptoms among Asian immigrants in the U.S.  
22  
23  
24  
25  
26  
27  
28  
29  
30  
31  
32  
33  
34  
35  
36  
37  
38  
39  
40  
41  
42  
43  
44  
45  
46  
47  
48  
49  
50  
51  
52  
53  
54  
55  
56  
57  
58  
59  
60

## Acknowledgements

The authors thank Daesung Choi for assisting the translation of survey instruments, Rema Henry for helping build the online survey, and the advisory board members (Kevin Park, Brooke Yang, and Kathryn Yount) for their feedback and support to recruit our target populations.

## Author's contributions

SK prepared the first draft of this manuscript. All authors provided critical edits, critiqued the manuscript for intellectual content, and approved the final version for submission.

## Funding statement

This work was supported by the Office of the Senior Vice President for Research at Emory University (Bidirectional Global Health Disparities Research Pilot Grant, JB and SK) and National Institute of Health/National Institute of Nursing Research (1K99NR017897-01, 4R00NR017897-03, JB). GMS was supported by a Society in Science—Branco Weiss Fellowship, NARSAD Young Investigator Grant #23958 from the Brain & Behavior Research Foundation, and National Institutes of Health grant K08 MH103443.

## Ethics approval

This study was approved by the Institutional Review Board at XX University (IRB ID: STUDY00000935).

## Competing interest statement

None declared.

## References

1. Pew Research Center. Key facts about Asian origin groups in the U.S. 2019 [Available from: <https://www.pewresearch.org/fact-tank/2019/05/22/key-facts-about-asian-origin-groups-in-the-u-s/> accessed November, 8 2019.
2. Islam NS, Khan S, Kwon S, et al. Methodological issues in the collection, analysis, and reporting of granular data in Asian American populations: historical challenges and potential solutions. *J Health Care Poor Underserved* 2010;21(4):1354-81. doi: 10.1353/hpu.2010.0939
3. Sansone RA, Sansone LA. Psychiatric disorders: a global look at facts and figures. *Psychiatry (Edgmont)* 2010;7(12):16-9. [published Online First: 2011/01/29]
4. Clarke T, Schiller J, Boersma P. Early Release of Selected Estimates Based on Data From the 2019 National Health Interview Survey: Division of Health Interview Statistics, National Center for Health Statistics; 2020 [Available from: <https://www.cdc.gov/nchs/data/nhis/earlyrelease/EarlyRelease202009-508.pdf> accessed November 18 2020.
5. Kim HJ, Park E, Storr CL, et al. Depression among Asian-American Adults in the Community: Systematic Review and Meta-Analysis. *PloS one* 2015;10(6):e0127760. doi: 10.1371/journal.pone.0127760 [published Online First: 2015/06/02]
6. Hong S, Walton E, Tamaki E, et al. Lifetime Prevalence of Mental Disorders among Asian Americans: Nativity, Gender, and Sociodemographic Correlates. *Asian Am J Psychol* 2014;5(4):353-63. doi: 10.1037/a0035680 [published Online First: 2015/01/27]



- 1  
2  
3 7. Williams NJ, Grandner MA, Wallace DM, et al. Social and behavioral predictors of  
4  
5 insufficient sleep among African Americans and Caucasians. *Sleep Med* 2016;18:103-7.  
6  
7 doi: 10.1016/j.sleep.2015.02.533 [published Online First: 2015/10/31]  
8  
9
- 10 8. Slavich GM, Irwin MR. From stress to inflammation and major depressive disorder: a social  
11  
12 signal transduction theory of depression. *Psychol Bull* 2014;140(3):774-815. doi:  
13  
14 10.1037/a0035302 [published Online First: 2014/01/15]  
15  
16
- 17 9. Slavich GM. Psychoneuroimmunology of stress and mental health. In: Harkness KL, Hayden  
18  
19 EP, eds. *The Oxford handbook of stress and mental health* New York: Oxford University  
20  
21 Press 2020:519-46.  
22  
23
- 24 10. Centers for Disease Control and Prevention. National Center for Injury Prevention and  
25  
26 Control. Web Based Injury Statistics Query and Reporting System (WISQARS) 2016  
27  
28 [Available from: <http://www.cdc.gov/injury/wisqars/index.html> accessed October 27  
29  
30 2019.  
31  
32
- 33 11. Yip T, Gee GC, Takeuchi DT. Racial discrimination and psychological distress: the impact  
34  
35 of ethnic identity and age among immigrant and United States-born Asian adults.  
36  
37 *Developmental psychology* 2008;44(3):787-800. doi: 10.1037/0012-1649.44.3.787  
38  
39 [published Online First: 2008/05/14]  
40  
41
- 42 12. Gee GC, Spencer M, Chen J, et al. The association between self-reported racial  
43  
44 discrimination and 12-month DSM-IV mental disorders among Asian Americans  
45  
46 nationwide. *Social science & medicine* 2007;64(10):1984-96. doi:  
47  
48 10.1016/j.socscimed.2007.02.013 [published Online First: 2007/03/22]  
49  
50  
51  
52  
53  
54  
55  
56  
57  
58  
59  
60

## Psychosocial Determinants, Gut Microbiome, &amp; Health

- 1  
2  
3  
4  
5  
6  
7  
8  
9  
10  
11  
12  
13  
14  
15  
16  
17  
18  
19  
20  
21  
22  
23  
24  
25  
26  
27  
28  
29  
30  
31  
32  
33  
34  
35  
36  
37  
38  
39  
40  
41  
42  
43  
44  
45  
46  
47  
48  
49  
50  
51  
52  
53  
54  
55  
56  
57  
58  
59  
60
13. Lee RM. Resilience Against Discrimination: Ethnic Identity and Other-Group Orientation as Protective Factors for Korean Americans. *Journal of Counseling Psychology* 2005;52(1):36-44. doi: 10.1037/0022-0167.52.1.36
  14. Banks KH, Kohn-Wood LP, Spencer M. An examination of the African American experience of everyday discrimination and symptoms of psychological distress. *Community Ment Health J* 2006;42(6):555-70. doi: 10.1007/s10597-006-9052-9 [published Online First: 2006/08/10]
  15. American Psychological Association Working Group on Stress and Health Disparities. Stress and health disparities: Contexts, mechanisms, and interventions among racial/ethnic minority and low-socioeconomic status populations 2017 [Available from: <http://www.apa.org/pi/health-disparities/resources/stress-report.aspx> accessed October 2 2020.
  16. Ruiz NG, Horowitz JM, Tamir C. Many Black and Asian Americans Say They Have Experienced Discrimination Amid the COVID-19 Outbreak: Pew Research Center,; 2020 [Available from: <https://www.pewsocialtrends.org/2020/07/01/many-black-and-asian-americans-say-they-have-experienced-discrimination-amid-the-covid-19-outbreak/> accessed October 2 2020.
  17. Nagayama Hall GC, Yee A. U.S. Mental Health Policy: Addressing the Neglect of Asian Americans. *Asian Am J Psychol* 2012;3(3):181-93. doi: 10.1037/a0029950 [published Online First: 2012/09/01]
  18. Hacimusalar Y, Eşel E. Suggested Biomarkers for Major Depressive Disorder. *Noro Psikiyatr Ars* 2018;55(3):280-90. doi: 10.5152/npa.2017.19482 [published Online First: 2018/09/19]

- 1  
2  
3  
4  
5  
6  
7  
8  
9  
10  
11  
12  
13  
14  
15  
16  
17  
18  
19  
20  
21  
22  
23  
24  
25  
26  
27  
28  
29  
30  
31  
32  
33  
34  
35  
36  
37  
38  
39  
40  
41  
42  
43  
44  
45  
46  
47  
48  
49  
50  
51  
52  
53  
54  
55  
56  
57  
58  
59  
60
19. Rhee SH, Pothoulakis C, Mayer EA. Principles and clinical implications of the brain-gut-enteric microbiota axis. *Nature reviews Gastroenterology & hepatology* 2009;6(5):306-14. doi: 10.1038/nrgastro.2009.35 [published Online First: 2009/05/01]
  20. Cryan JF, Dinan TG. Mind-altering microorganisms: the impact of the gut microbiota on brain and behaviour. *Nature Reviews Neuroscience* 2012;13(10):701-12. doi: 10.1038/nrn3346
  21. Savage DC. Microbial ecology of the gastrointestinal tract. *Annu Rev Microbiol* 1977;31:107-33. doi: 10.1146/annurev.mi.31.100177.000543
  22. Knight R, Buhler B. Follow Your Gut: The Enormous Impact of Tiny Microbes. New York, NY: Simon & Schuster 2015.
  23. Vangay P, Johnson AJ, Ward TL, et al. US Immigration Westernizes the Human Gut Microbiome. *Cell* 2018;175(4):962-72.e10. doi: 10.1016/j.cell.2018.10.029 [published Online First: 2018/11/06]
  24. Kaplan RC, Wang Z, Usyk M, et al. Gut microbiome composition in the Hispanic Community Health Study/Study of Latinos is shaped by geographic relocation, environmental factors, and obesity. *Genome Biology* 2019;20(1):219. doi: 10.1186/s13059-019-1831-z
  25. Montiel-Castro A, González-Cervantes R, Bravo-Ruiseco G, et al. The microbiota-gut-brain axis: neurobehavioral correlates, health and sociality. *Frontiers in Integrative Neuroscience* 2013;7(70) doi: 10.3389/fnint.2013.00070
  26. Strasser B, Becker K, Fuchs D, et al. Kynurenine pathway metabolism and immune activation: Peripheral measurements in psychiatric and co-morbid conditions.

## Psychosocial Determinants, Gut Microbiome, &amp; Health

- 1  
2  
3 *Neuropharmacology* 2017;112(Pt B):286-96. doi: 10.1016/j.neuropharm.2016.02.030  
4  
5 [published Online First: 2016/03/01]  
6  
7  
8 27. Cashion AK, Gill J, Hawes R, et al. National Institutes of Health Symptom Science Model  
9  
10 sheds light on patient symptoms. *Nurs Outlook* 2016;64(5):499-506. doi:  
11  
12 10.1016/j.outlook.2016.05.008 [published Online First: 2016/06/29]  
13  
14  
15 28. Jackson CL, Kawachi I, Redline S, et al. Asian-White disparities in short sleep duration by  
16  
17 industry of employment and occupation in the US: a cross-sectional study. *BMC public*  
18  
19 *health* 2014;14:552. doi: 10.1186/1471-2458-14-552 [published Online First:  
20  
21 2014/06/05]  
22  
23  
24 29. Rumble ME, White KH, Benca RM. Sleep Disturbances in Mood Disorders. *Psychiatr Clin*  
25  
26 *North Am* 2015;38(4):743-59. doi: 10.1016/j.psc.2015.07.006 [published Online First:  
27  
28 2015/11/26]  
29  
30  
31 30. Murphy MJ, Peterson MJ. Sleep Disturbances in Depression. *Sleep Med Clin* 2015;10(1):17-  
32  
33 23. doi: 10.1016/j.jsmc.2014.11.009 [published Online First: 2015/06/10]  
34  
35  
36 31. Cox RC, Olatunji BO. A systematic review of sleep disturbance in anxiety and related  
37  
38 disorders. *J Anxiety Disord* 2016;37:104-29. doi: 10.1016/j.janxdis.2015.12.001  
39  
40 [published Online First: 2016/01/09]  
41  
42  
43 32. NPR/Robert Wood Johnson Foundation/Harvard School of Public Health. The Burden of  
44  
45 Stress in America 2014 [Available from:  
46  
47 [https://media.npr.org/documents/2014/july/npr\\_rwfj\\_harvard\\_stress\\_poll.pdf](https://media.npr.org/documents/2014/july/npr_rwfj_harvard_stress_poll.pdf) accessed  
48  
49 Octoboeer 2 2020.  
50  
51  
52  
53  
54  
55  
56  
57  
58  
59  
60

- 1  
2  
3 33. Ong AD, Cerrada C, Lee RA, et al. Stigma consciousness, racial microaggressions, and sleep  
4 disturbance among Asian Americans. *Asian American Journal of Psychology*  
5  
6 2017;8(1):72-81. doi: 10.1037/aap0000062  
7  
8  
9  
10 34. Karlsson B, Knutsson A, Lindahl B. Is there an association between shift work and having a  
11 metabolic syndrome? Results from a population based study of 27,485 people. *Occup*  
12  
13 *Environ Med* 2001;58(11):747-52. doi: 10.1136/oem.58.11.747  
14  
15  
16  
17 35. Turek FW, Joshu C, Kohsaka A, et al. Obesity and metabolic syndrome in circadian Clock  
18 mutant mice. *Science* 2005;308(5724):1043-5. doi: 10.1126/science.1108750 [published  
19  
20 Online First: 2005/04/23]  
21  
22  
23  
24 36. Julious SA. Sample size of 12 per group rule of thumb for a pilot study. *Pharmaceutical*  
25  
26 *Statistics: The Journal of Applied Statistics in the Pharmaceutical Industry*  
27  
28 2005;4(4):287-91.  
29  
30  
31 37. Kieser M, Wassmer G. On the use of the upper confidence limit for the variance from a pilot  
32 sample for sample size determination. *Biometrical journal* 1996;38(8):941-49.  
33  
34  
35 38. Im EO, Kim S, Xu S, et al. Issues in Recruiting and Retaining Asian American Breast Cancer  
36 Survivors in a Technology-Based Intervention Study. *Cancer nursing* 2020;43(1):E22-  
37 e29. doi: 10.1097/ncc.0000000000000657 [published Online First: 2018/10/23]  
38  
39  
40  
41  
42 39. World Health Organization. Process of translation and adaptation of instruments 2020  
43 [Available from: [https://www.who.int/substance\\_abuse/research\\_tools/translation/en/](https://www.who.int/substance_abuse/research_tools/translation/en/)  
44 accessed August 25 2020.  
45  
46  
47  
48  
49 40. Suinn RM, Ahuna C, Khoo G. The Suinn-Lew Asian Self-Identity Acculturation Scale:  
50 Concurrent and factorial validation. *Educational and Psychological Measurement*  
51  
52 1992;52(4):1041-46. doi: 10.1177/0013164492052004028  
53  
54  
55  
56  
57  
58  
59  
60

## Psychosocial Determinants, Gut Microbiome, &amp; Health

- 1  
2  
3  
4  
5  
6  
7  
8  
9  
10  
11  
12  
13  
14  
15  
16  
17  
18  
19  
20  
21  
22  
23  
24  
25  
26  
27  
28  
29  
30  
31  
32  
33  
34  
35  
36  
37  
38  
39  
40  
41  
42  
43  
44  
45  
46  
47  
48  
49  
50  
51  
52  
53  
54  
55  
56  
57  
58  
59  
60
41. Im EO, Kim S, Ji X, et al. Improving menopausal symptoms through promoting physical activity: a pilot Web-based intervention study among Asian Americans. *Menopause* 2017;24(6):653-62. doi: 10.1097/gme.0000000000000825 [published Online First: 2017/01/25]
42. Jang Y, Chiriboga DA. Living in a Different World: Acculturative Stress Among Korean American Elders. *The Journals of Gerontology: Series B* 2010;65B(1):14-21. doi: 10.1093/geronb/gbp019
43. Yoo HC, Steger MF, Lee RM. Validation of the subtle and blatant racism scale for Asian American college students (SABR-A<sup>2</sup>). *Cultural Diversity and Ethnic Minority Psychology* 2010;16(3):323-34. doi: 10.1037/a0018674
44. Slavich GM, Shields GS. Assessing Lifetime Stress Exposure Using the Stress and Adversity Inventory for Adults (Adult STRAIN): An Overview and Initial Validation. *Psychosomatic medicine* 2018;80(1):17-27. doi: 10.1097/PSY.0000000000000534
45. Sturmbauer SC, Shields GS, Hetzel EL, et al. The Stress and Adversity Inventory for Adults (Adult STRAIN) in German: An overview and initial validation. *PLoS One* 2019;14(5):e0216419. doi: 10.1371/journal.pone.0216419 [published Online First: 2019/05/10]
46. Cazassa MJ, Oliveira MdS, Spahr CM, et al. The Stress and Adversity Inventory for Adults (Adult STRAIN) in Brazilian Portuguese: Initial validation and links with executive function, sleep, and mental and physical health. *Frontiers in Psychology* 2020;10:3083.
47. Slavich GM, Shields GS. Assessing Lifetime Stress Exposure Using the Stress and Adversity Inventory for Adults (Adult STRAIN): An Overview and Initial Validation. *Psychosom*

- 1  
2  
3 *Med* 2018;80(1):17-27. doi: 10.1097/psy.0000000000000534 [published Online First:  
4  
5 2017/10/11]  
6  
7
- 8 48. Harkness A, Behar-Zusman V, Safren SA. Understanding the Impact of COVID-19 on  
9  
10 Latino Sexual Minority Men in a US HIV Hot Spot. *AIDS and Behavior*  
11  
12 2020;24(7):2017-23. doi: 10.1007/s10461-020-02862-w  
13  
14
- 15 49. Patient-Reported Outcomes Measurement Information System. DEPRESSION: A brief guide  
16  
17 to the PROMIS© Depression instruments 2019 [updated February 28, 2019. Available  
18  
19 from: <https://www.healthmeasures.net/search-view-measures?task=Search.search>  
20  
21 accessed September 22 2020.  
22  
23
- 24 50. Patient-Reported Outcomes Measurement Information System. ANXIETY: A brief guide to  
25  
26 the PROMIS© Anxiety instruments 2019 [updated March 1, 2019. Available from:  
27  
28 <https://www.healthmeasures.net/search-view-measures?task=Search.search> accessed  
29  
30 September 24 2020.  
31  
32
- 33 51. Backhaus J, Junghanns K, Broocks A, et al. Test-retest reliability and validity of the  
34  
35 Pittsburgh Sleep Quality Index in primary insomnia. *J Psychosom Res* 2002;53(3):737-  
36  
37 40. doi: 10.1016/s0022-3999(02)00330-6 [published Online First: 2002/09/10]  
38  
39
- 40 52. Sohn SI, Kim DH, Lee MY, et al. The reliability and validity of the Korean version of the  
41  
42 Pittsburgh Sleep Quality Index. *Sleep Breath* 2012;16(3):803-12. doi: 10.1007/s11325-  
43  
44 011-0579-9 [published Online First: 2011/09/09]  
45  
46
- 47 53. Rifas-Shiman SL, Willett WC, Lobb R, et al. PrimeScreen, a brief dietary screening tool:  
48  
49 reproducibility and comparability with both a longer food frequency questionnaire and  
50  
51 biomarkers. *Public Health Nutr* 2001;4(2):249-54. doi: 10.1079/phn200061 [published  
52  
53 Online First: 2001/04/12]  
54  
55  
56  
57  
58  
59  
60

## Psychosocial Determinants, Gut Microbiome, &amp; Health

- 1  
2  
3 54. Sun S, Lulla A, Sioda M, et al. Gut Microbiota Composition and Blood Pressure.  
4  
5 *Hypertension* 2019;73(5):998-1006. doi: 10.1161/hypertensionaha.118.12109 [published  
6  
7 Online First: 2019/03/25]  
8  
9
- 10 55. Methé BA, Nelson KE, Pop M, et al. A framework for human microbiome research. *Nature*  
11  
12 2012;486(7402):215-21. doi: 10.1038/nature11209  
13  
14
- 15 56. Chen Z, Hui PC, Hui M, et al. Impact of Preservation Method and 16S rRNA Hypervariable  
16  
17 Region on Gut Microbiota Profiling. *mSystems* 2019;4(1):e00271-18. doi:  
18  
19 10.1128/mSystems.00271-18  
20  
21
- 22 57. Bukin YS, Galachyants YP, Morozov IV, et al. The effect of 16S rRNA region choice on  
23  
24 bacterial community metabarcoding results. *Scientific Data* 2019;6(1):190007. doi:  
25  
26 10.1038/sdata.2019.7  
27  
28
- 29 58. Callahan BJ, McMurdie PJ, Rosen MJ, et al. DADA2: High-resolution sample inference  
30  
31 from Illumina amplicon data. *Nat Methods* 2016;13(7):581-3. [published Online First:  
32  
33 2016/05/24]  
34  
35
- 36 59. Callahan BJ, McMurdie PJ, Holmes SP. Exact sequence variants should replace operational  
37  
38 taxonomic units in marker-gene data analysis. *International Society for Microbial*  
39  
40 *Ecology Journal* 2017;11(12):2639-43. doi: 10.1038/ismej.2017.119  
41  
42
- 43 60. Mandal S, Van Treuren W, White RA, et al. Analysis of composition of microbiomes: a  
44  
45 novel method for studying microbial composition. *Microb Ecol Health Dis*  
46  
47 2015;26:27663. doi: 10.3402/mehd.v26.27663 [published Online First: 2015/06/02]  
48  
49
- 50 61. Segata N, Izard J, Waldron L, et al. Metagenomic biomarker discovery and explanation.  
51  
52 *Genome biology* 2011;12(6):R60-R60. doi: 10.1186/gb-2011-12-6-r60  
53  
54  
55  
56  
57  
58  
59  
60



## Psychosocial Determinants, Gut Microbiome, &amp; Health

- 1  
2  
3  
4  
5  
6  
7  
8  
9  
10  
11  
12  
13  
14  
15  
16  
17  
18  
19  
20  
21  
22  
23  
24  
25  
26  
27  
28  
29  
30  
31  
32  
33  
34  
35  
36  
37  
38  
39  
40  
41  
42  
43  
44  
45  
46  
47  
48  
49  
50  
51  
52  
53  
54  
55  
56  
57  
58  
59  
60
62. Bolyen E, Rideout JR, Dillon MR, et al. Reproducible, interactive, scalable and extensible microbiome data science using QIIME 2. *Nature Biotechnology* 2019;37(8):852-57. doi: 10.1038/s41587-019-0209-9
63. Bai J, Jhaney I, Daniel G, et al. Pilot Study of Vaginal Microbiome Using QIIME 2™ in Women With Gynecologic Cancer Before and After Radiation Therapy. *Oncology nursing forum* 2019;46(2):E48-e59. doi: 10.1188/19.Onf.E48-e59 [published Online First: 2019/02/16]
64. Bai J, Jhaney I, Wells J. Developing a Reproducible Microbiome Data Analysis Pipeline Using the Amazon Web Services Cloud for a Cancer Research Group: Proof-of-Concept Study. *JMIR medical informatics* 2019;7(4):e14667-e67. doi: 10.2196/14667
65. Harris PA, Taylor R, Thielke R, et al. Research electronic data capture (REDCap) - A metadata-driven methodology and workflow process for providing translational research informatics support. *J Biomed Inform* 2009;42(2):377-81.
66. Aqua JK. Hiding Behind a Mask: Perspectives from an Asian American Epidemiologist. *Epidemiology* 2020; Publish Ahead of Print doi: 10.1097/ede.0000000000001282
67. Czeisler MÉ, Lane RI, Petrosky E, et al. Mental health, substance use, and suicidal ideation during the COVID-19 pandemic—United States, June 24–30, 2020. *Morbidity and Mortality Weekly Report* 2020;69(32):1049.
68. Slavich GM. Social Safety Theory: A Biologically Based Evolutionary Perspective on Life Stress, Health, and Behavior. *Annual Review of Clinical Psychology* 2020;16(1):265-95. doi: 10.1146/annurev-clinpsy-032816-045159

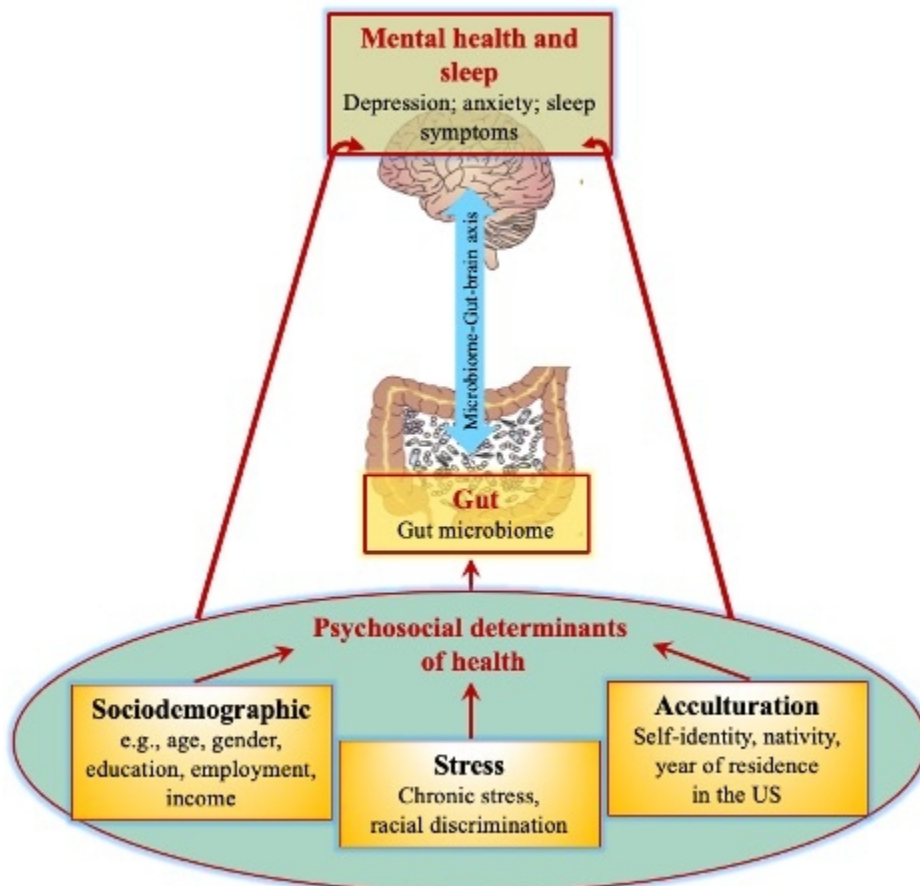

Figure 1

165x160mm (72 x 72 DPI)

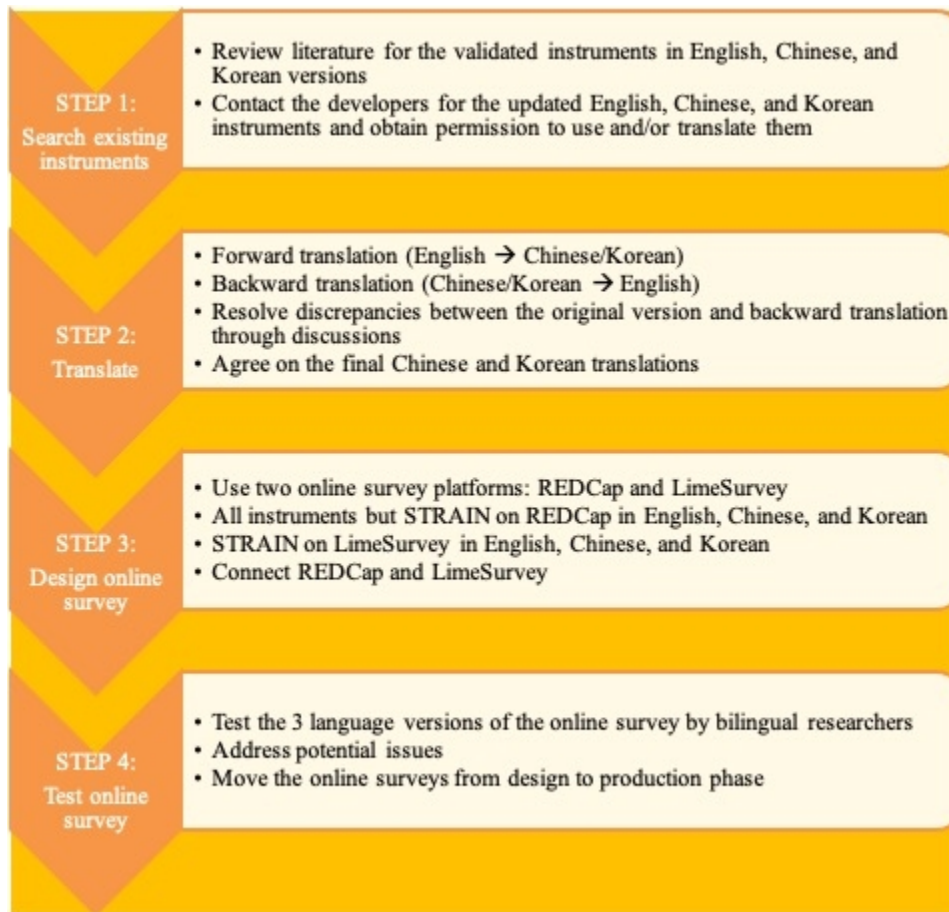

Figure 2

170x160mm (72 x 72 DPI)

**Table 1. Study Measures**

| Variable                              | Measure            | Instrument                                                                                          | Need for translation |
|---------------------------------------|--------------------|-----------------------------------------------------------------------------------------------------|----------------------|
| Sociodemographic and clinical factors |                    | Demographics Short Form (e.g., sociodemographic characteristics, health behaviors, medical history) | Y                    |
| Psychosocial factors                  | Acculturation      | Suinn-Lew Self Identity Acculturation Scale                                                         | Y                    |
|                                       |                    | Demographic Short Form (e.g., foreign-born status, duration of US residence, age at immigration)    | Y                    |
|                                       | Stress             | Stress and Adversity Inventory for Adults                                                           | Y                    |
|                                       |                    | Pandemic Stress Index                                                                               | Y                    |
|                                       |                    | Acculturative Stress Scale                                                                          | N                    |
|                                       |                    | Subtle and Blatant Racism Scale for Asian Americans                                                 | Y                    |
| Diet                                  | PrimeScreen Survey | Y                                                                                                   |                      |
| Biological factor                     | Gut microbiome     | Fecal specimen                                                                                      | Y<br>(instructions)  |
| Mental health outcomes                | Depression         | PROMIS Short Form–Depression                                                                        | N                    |
|                                       | Anxiety            | PROMIS Short Form–Anxiety                                                                           | N                    |
| Sleep symptoms                        | Sleep quality      | Pittsburgh Sleep Quality Index                                                                      | N                    |

Figure 1. Conceptual Framework

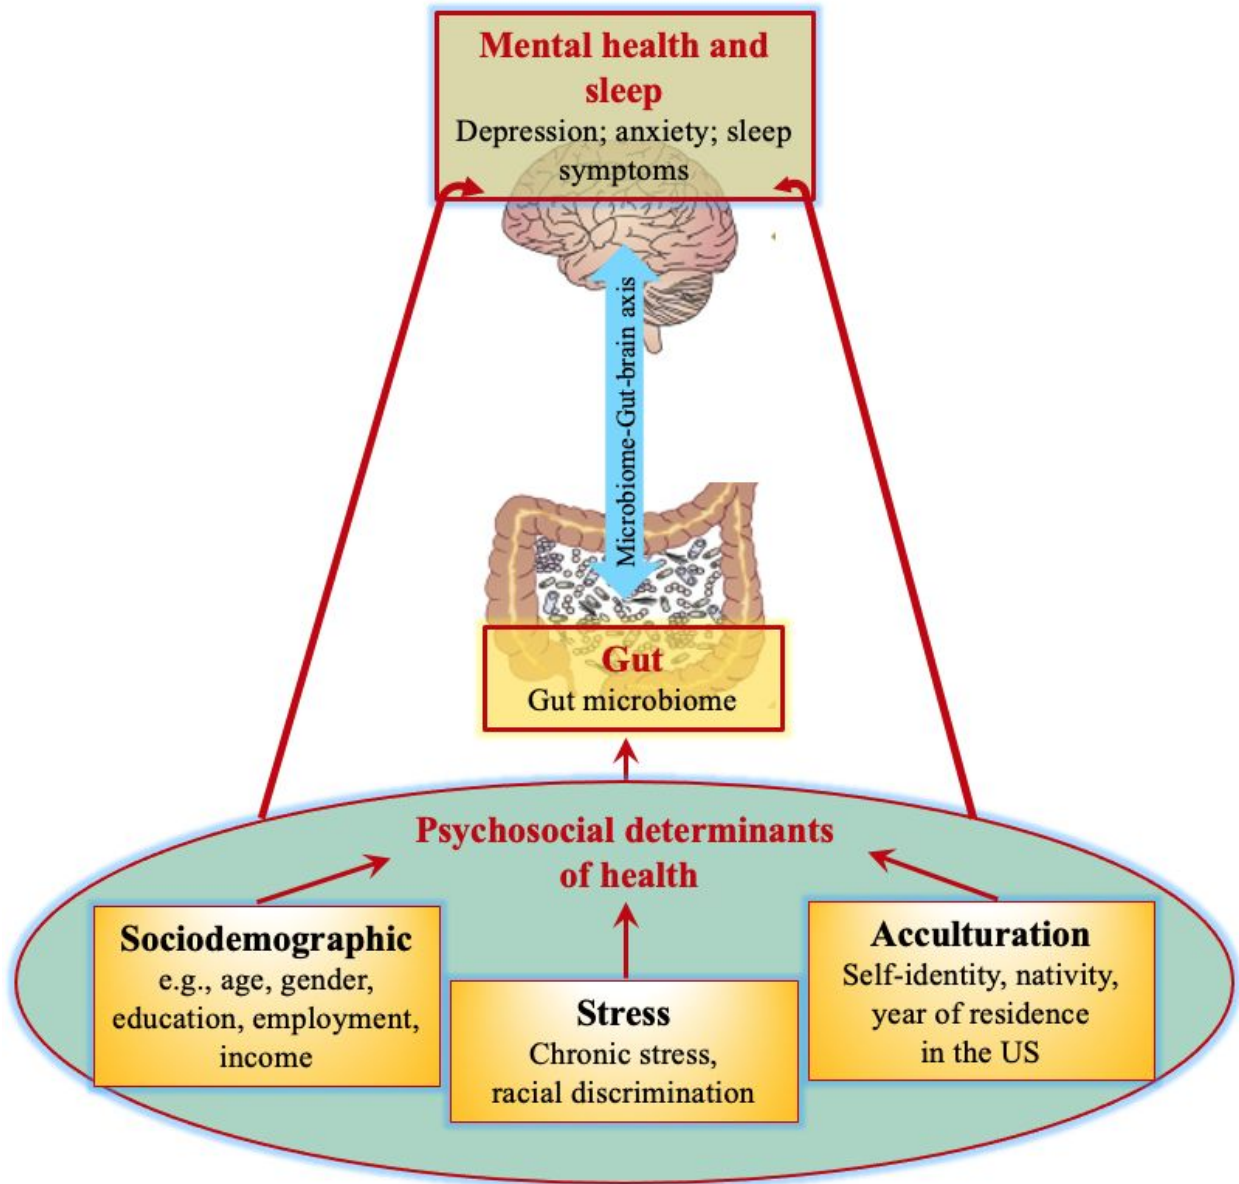

**Figure 2. Multi-lingual Survey Development and Testing Process**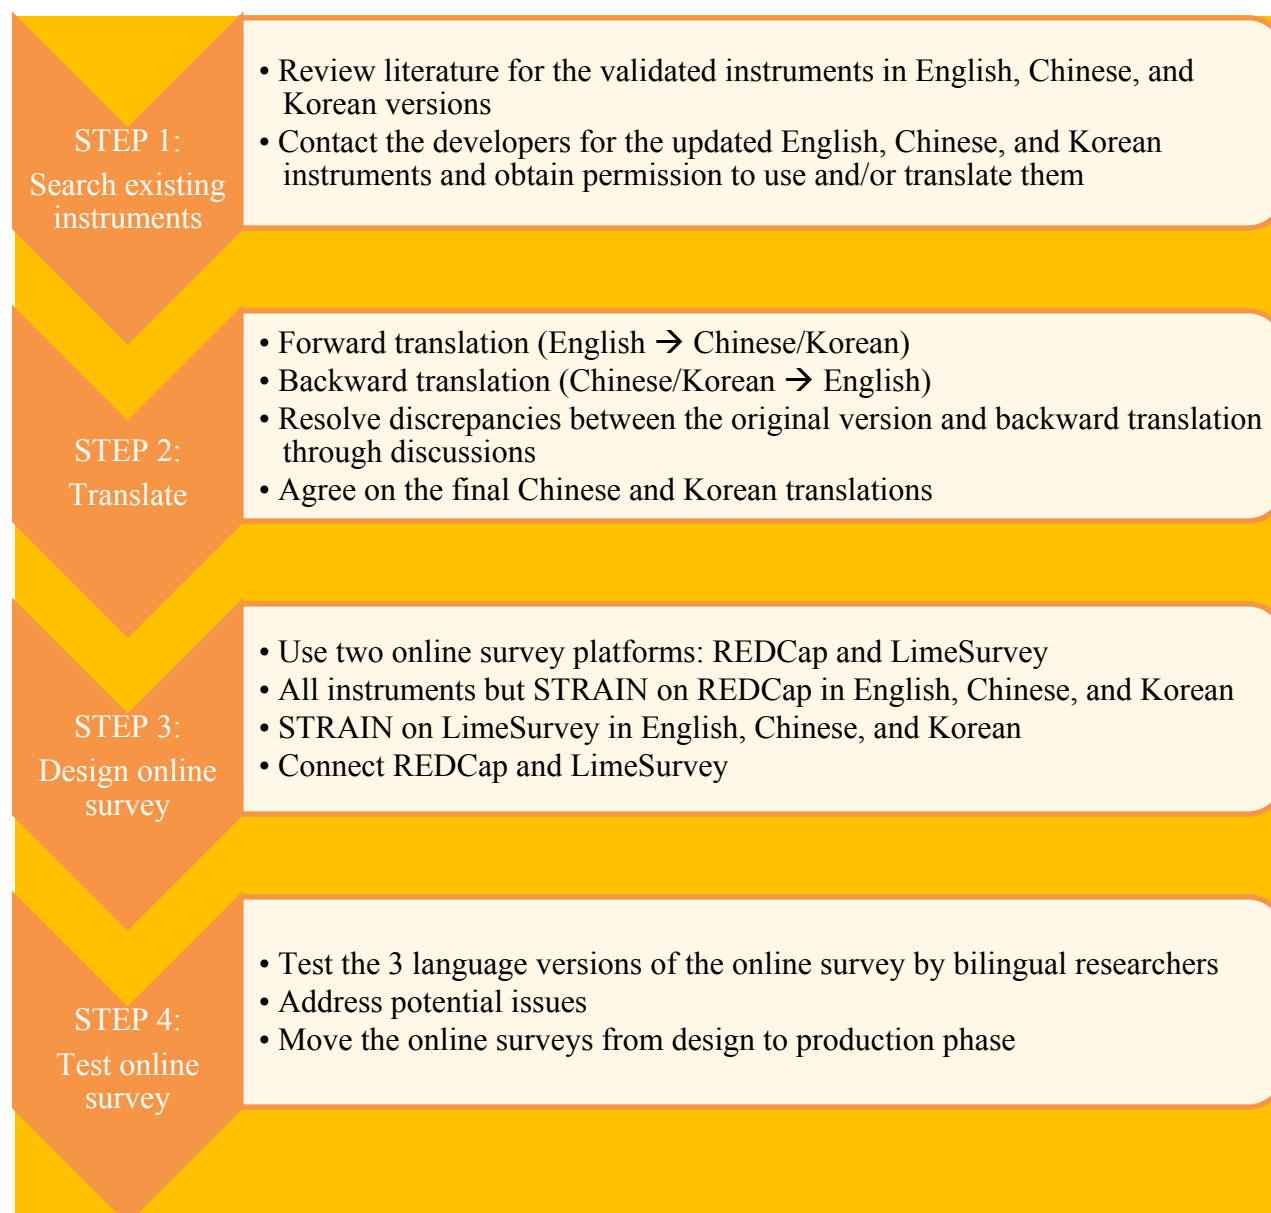

# BMJ Open

## How Stress, Discrimination, Acculturation, and the Gut Microbiome Affect Depression, Anxiety, and Sleep among Chinese and Korean Immigrants in the United States: A Cross-Sectional Pilot Study Protocol

|                                 |                                                                                                                                                                                                                                                                                                                                                                                                                                                                                                                                                                                                      |
|---------------------------------|------------------------------------------------------------------------------------------------------------------------------------------------------------------------------------------------------------------------------------------------------------------------------------------------------------------------------------------------------------------------------------------------------------------------------------------------------------------------------------------------------------------------------------------------------------------------------------------------------|
| Journal:                        | <i>BMJ Open</i>                                                                                                                                                                                                                                                                                                                                                                                                                                                                                                                                                                                      |
| Manuscript ID                   | bmjopen-2020-047281.R1                                                                                                                                                                                                                                                                                                                                                                                                                                                                                                                                                                               |
| Article Type:                   | Protocol                                                                                                                                                                                                                                                                                                                                                                                                                                                                                                                                                                                             |
| Date Submitted by the Author:   | 23-Apr-2021                                                                                                                                                                                                                                                                                                                                                                                                                                                                                                                                                                                          |
| Complete List of Authors:       | Kim, Sangmi; Emory University Nell Hodgson Woodruff School of Nursing,<br>Zhang, Wenhui; Emory University, School of Nursing<br>Pak, Victoria; Emory University Nell Hodgson Woodruff School of Nursing<br>Aqua, Jasmine; Rollins School of Public Health<br>Hertzberg, Vicki ; Emory University Nell Hodgson Woodruff School of Nursing<br>Spahr, Chandler ; University of California Riverside, Department of Psychology<br>Slavich, George; University of California Los Angeles, Psychiatry and Biobehavioral Sciences<br>Bai, Jinbing; Emory University Nell Hodgson Woodruff School of Nursing |
| <b>Primary Subject Heading</b>: | Mental health                                                                                                                                                                                                                                                                                                                                                                                                                                                                                                                                                                                        |
| Secondary Subject Heading:      | Public health                                                                                                                                                                                                                                                                                                                                                                                                                                                                                                                                                                                        |
| Keywords:                       | PUBLIC HEALTH, SOCIAL MEDICINE, MENTAL HEALTH                                                                                                                                                                                                                                                                                                                                                                                                                                                                                                                                                        |
|                                 |                                                                                                                                                                                                                                                                                                                                                                                                                                                                                                                                                                                                      |

SCHOLARONE™  
Manuscripts



I, the Submitting Author has the right to grant and does grant on behalf of all authors of the Work (as defined in the below author licence), an exclusive licence and/or a non-exclusive licence for contributions from authors who are: i) UK Crown employees; ii) where BMJ has agreed a CC-BY licence shall apply, and/or iii) in accordance with the terms applicable for US Federal Government officers or employees acting as part of their official duties; on a worldwide, perpetual, irrevocable, royalty-free basis to BMJ Publishing Group Ltd ("BMJ") its licensees and where the relevant Journal is co-owned by BMJ to the co-owners of the Journal, to publish the Work in this journal and any other BMJ products and to exploit all rights, as set out in our [licence](#).

The Submitting Author accepts and understands that any supply made under these terms is made by BMJ to the Submitting Author unless you are acting as an employee on behalf of your employer or a postgraduate student of an affiliated institution which is paying any applicable article publishing charge ("APC") for Open Access articles. Where the Submitting Author wishes to make the Work available on an Open Access basis (and intends to pay the relevant APC), the terms of reuse of such Open Access shall be governed by a Creative Commons licence – details of these licences and which [Creative Commons](#) licence will apply to this Work are set out in our licence referred to above.

Other than as permitted in any relevant BMJ Author's Self Archiving Policies, I confirm this Work has not been accepted for publication elsewhere, is not being considered for publication elsewhere and does not duplicate material already published. I confirm all authors consent to publication of this Work and authorise the granting of this licence.



Psychosocial Factors, Gut Microbiome, & Health in Asian Americans

1  
2  
3 **How Stress, Discrimination, Acculturation, and the Gut Microbiome Affect Depression,**  
4  
5 **Anxiety, and Sleep among Chinese and Korean Immigrants in the United States:**  
6  
7 **A Cross-Sectional Pilot Study Protocol**  
8  
9

10  
11  
12 Sangmi Kim, PhD, MPH, RN <sup>1</sup>, Wenhui Zhang, PhD, MSc, RN <sup>1,2</sup>, Victoria Pak, PhD, RN, MS,  
13  
14 MTR, FAAN <sup>1</sup>, Jasmine Ko Aqua, MPH <sup>3</sup>, Vicki Stover Hertzberg, PhD, FASA, P.Stat.<sup>1,2</sup>,  
15  
16 Chandler M. Spahr, MA <sup>4</sup>, George M. Slavich, PhD <sup>5</sup>, Jinbing Bai, PhD, MSN, RN, FAAN <sup>1,6\*</sup>  
17  
18  
19  
20

21 <sup>1</sup> Nell Hodgson Woodruff School of Nursing, Emory University, Atlanta, GA, USA

22  
23 <sup>2</sup> Center for Data Science, Nell Hodgson Woodruff School of Nursing, Emory University,  
24  
25 Atlanta, GA, USA  
26  
27

28  
29 <sup>3</sup> Department of Epidemiology, Rollins School of Public Health, Emory University, Atlanta, GA,  
30  
31 USA  
32

33 <sup>4</sup> Department of Psychology, University of California, Riverside, CA, USA  
34

35 <sup>5</sup> Cousins Center for Psychoneuroimmunology and Department of Psychiatry and Biobehavioral  
36  
37 Sciences, University of California, Los Angeles, CA, USA  
38  
39

40 <sup>6</sup> Winship Cancer Institute, Emory University, Atlanta, GA, USA  
41  
42  
43

44 **\*Correspondence:** Jinbing Bai, PhD, MSN, RN, FAAN, Nell Hodgson Woodruff School of  
45  
46 Nursing, Emory University, 1520 Clifton Road NE, Atlanta, GA 30322. Phone: +1 404-727-  
47  
48 2466. Email: [jinbing.bai@emory.edu](mailto:jinbing.bai@emory.edu)  
49  
50  
51  
52  
53  
54  
55  
56  
57  
58  
59  
60

## Psychosocial Factors, Gut Microbiome, &amp; Health in Asian Americans

1  
2  
3 **Keywords (MeSH Terms):** Stress, Psychological; Racism; Acculturation; Gastrointestinal  
4  
5 Microbiome; Mental Health  
6

7  
8 **Word count:** 5,379 words  
9

10  
11  
12 **Funding:** This study was supported by the Bidirectional Global Health Disparities Research  
13  
14 Award at Emory University (S.K. and J.B.) and National Institute of Health/National Institute of  
15 Nursing Research (1K99NR017897-01, 4R00NR017897-03, J.B.). G.M.S. was supported by a  
16  
17 Society in Science—Branco Weiss Fellowship, NARSAD Young Investigator Grant #23958  
18  
19 from the Brain & Behavior Research Foundation, and National Institutes of Health grant K08  
20  
21  
22  
23  
24  
25  
26  
27  
28  
29  
30  
31  
32  
33  
34  
35  
36  
37  
38  
39  
40  
41  
42  
43  
44  
45  
46  
47  
48  
49  
50  
51  
52  
53  
54  
55  
56  
57  
58  
59  
60

## Psychosocial Factors, Gut Microbiome, &amp; Health in Asian Americans

**Abstract**

**Introduction:** Although a considerable proportion of Asians in the United States experience depression, anxiety, and poor sleep, these health issues have been underestimated due to the model minority myth about Asians, the stigma associated with mental illness, lower rates of treatment seeking, and a shortage of culturally tailored mental health services. Indeed, despite emerging evidence of links between psychosocial risk factors, the gut microbiome, and depression, anxiety, and sleep quality, very few studies have examined how these factors are related in Chinese and Korean immigrants in the U.S. The purpose of this pilot study was to address this issue by (a) testing the usability and feasibility of the study's multilingual survey measures and biospecimen collection procedure among Chinese and Korean immigrants in the U.S., and (b) examining how stress, discrimination, acculturation, and the gut microbiome are associated with depression, anxiety, and sleep quality in this population.

**Method and Analysis:** This is a cross-sectional pilot study among 1st and 2nd generations of adult Chinese and Korean immigrants in the greater Atlanta area (Georgia, U.S.A.). We collected (a) gut microbiome samples and (b) data on psychosocial risk factors, depression, anxiety, and sleep disturbance using validated, online surveys in English, Chinese, and Korean. We aim to recruit 60 participants (30 Chinese, 30 Korean). We will profile participants' gut microbiome using 16S rRNA V3-V4 sequencing data, which will be analyzed by QIIME 2™. Associations of the gut microbiome and psychosocial factors with depression, anxiety, and sleep disturbance will be analyzed using descriptive and inferential statistics, including linear regression.

**Ethics and Dissemination:** This study has been approved by the Institutional Review Board at Emory University. Results will be made available to Chinese and Korean community members, the funder, and other researchers and the broader scientific community.

**Strengths and Limitations**

- This study is the first to examine psychosocial and biological mechanisms underlying mental health and sleep quality among Chinese and Korean immigrants.
- The study will collect data among Asians in the U.S., who have been historically underrepresented in biomedical research.
- The study is timely, as the COVID-19 pandemic has greatly increased stress and racial discrimination among Asians in the U.S.
- The study uses a state-of-the-art measure of lifetime stress exposure (i.e., the STRAIN) and several other culturally valid assessment instruments.
- The cross-sectional study design will limit the testing of directionality and causal associations but will help inform future longitudinal research.

## Psychosocial Factors, Gut Microbiome, &amp; Health in Asian Americans

**Introduction**

Asians are the fastest-growing racial group in the United States,<sup>1</sup> with Chinese (23%) and Koreans (9%) combined representing the largest subgroup of Asians. The increasing size of the Asian population nationwide calls for more attention to be paid to the unique health needs of this population, which has been historically underestimated and underrepresented, partly because of the “model minority myth” that characterizes Asians as being relatively successful with few problems.<sup>2</sup> However, Asian Americans experience many mental health problems including depression and anxiety in high proportions,<sup>3 4</sup> making this topic an important public health priority, especially during the current COVID-19 pandemic.

Although depressive and anxiety disorders are the most common and debilitating psychiatric illnesses in the U.S. adult population,<sup>5 6</sup> the literature investigating these illnesses among Asians is limited.<sup>3</sup> This has occurred despite the fact that depression is the most frequently diagnosed mental disorder in Asian Americans. The pooled prevalence rate of depression ranges from 26.9% to 35.6%,<sup>3</sup> and the lifetime prevalence is estimated to be 9.1%.<sup>4</sup> Asian Americans, as compared to their White peers, tend to manifest more prevalent, persistent, and recurrent depressive symptoms.<sup>3 4 7</sup> This is a critical point, as depression is the leading cause of disability worldwide and can lead to other severe health problems, including chronic physical health conditions<sup>8 9</sup> and suicide. In fact, suicide is the leading cause of death for Asian Americans aged 15 to 24 years.<sup>10</sup> Additionally, anxiety disorders—including panic disorder, agoraphobia without panic disorder, social phobia, generalized anxiety disorder, and post-traumatic stress disorder—are experienced by 10.2% of Asian Americans.<sup>4</sup> Moreover, due to the stigma attached to mental illness and the lack of culturally competent mental health services, Asian Americans are less likely than their White peers to ask for help and seek treatment,<sup>4,8</sup>

## Psychosocial Factors, Gut Microbiome, &amp; Health in Asian Americans

1  
2  
3 which further contribute to the racial and ethnic disparities in mental health outcomes that are  
4  
5 evident for Asian Americans living in the U.S.  
6

7  
8 Understanding depression and anxiety among Asian immigrants is complicated by the  
9  
10 fact that their mental health is determined by several factors, including chronic stress exposure,  
11  
12 racial discrimination, and level of acculturation.<sup>3 7 11</sup> It has been reported that the more Asian  
13  
14 Americans are exposed to discrimination and acculturative life stress, the more likely they are to  
15  
16 experience depression and anxiety.<sup>12</sup> Additionally, Asian Americans experience racial  
17  
18 discrimination on multiple levels (i.e., cultural, structural, interpersonal, and internalized).<sup>13-15</sup>  
19  
20 Moreover, racial discrimination and aggression toward Asians has substantially increased during  
21  
22 the COVID-19 pandemic. Relative to White, Black, and Hispanic peers, for example, Asian  
23  
24 Americans are more likely to report that since the COVID-19 pandemic, people acted as if they  
25  
26 were uncomfortable around them (39%), that they have been subjected to slurs or jokes (31%),  
27  
28 and that they have feared someone might threaten or physically attack them (26%).<sup>16</sup> Finally,  
29  
30 60% of Asian immigrants, including those with high educational attainment, experience  
31  
32 acculturative stress associated with learning and fitting into a new culture, concerns about legal  
33  
34 status, cultural conflicts, and language barriers.<sup>17</sup>  
35  
36  
37  
38  
39

40 Given the complexity of the psychosocial determinants underlying depression and  
41  
42 anxiety, it is challenging to identify Asian Americans at high risk of developing these psychiatric  
43  
44 disorders, particularly given that they are more reluctant to disclose their mental health status to  
45  
46 others.<sup>3 17</sup> Thus far, a few biomarkers have been used to predict depression, including cytokines  
47  
48 and inflammatory markers, oxidative stress markers, endocrine markers, energy balance  
49  
50 hormones, genetic/epigenetic factors, and structural and functional brain imaging.<sup>18</sup> Emerging  
51  
52 evidence suggests that the gut microbiome also plays an important role in human mental health  
53  
54  
55  
56  
57  
58  
59  
60

## Psychosocial Factors, Gut Microbiome, &amp; Health in Asian Americans

1  
2  
3 via the microbiome-gut-brain axis, a bidirectional network that enables the gut microbiome to  
4 affect the brain and mental health through immune, neural, and hormonal pathways.<sup>19</sup> The gut  
5 microbiome is the collection of all genomes of the microbes in the human gastrointestinal tract.<sup>20</sup>  
6  
7 The human gut hosts tens of trillions of microbes, representing 500 species on average.<sup>21 22</sup>  
8  
9 Notably, it is heavily influenced by an individual's sociodemographic characteristics, changes in  
10 diet, lifestyle, stress, and geographic environment, all of which represent significant risk factors  
11 for depression and anxiety among Asian immigrants.<sup>23 24</sup> More specifically, migration from non-  
12 western nations to the U.S. is associated with a loss in the gut microbial diversity and function in  
13 a manner that may predispose Asian immigrants to high risk of metabolic diseases and mental  
14 disorders.<sup>23</sup> Therefore, subsequent changes in both the diversity and function of the gut  
15 microbiome after migration provide a unique opportunity to study how living environment in the  
16 U.S. represents an external stimulus that affects immigrants' mental health in the context of  
17 stress, discrimination, and acculturation.<sup>23 25 26</sup>  
18  
19  
20  
21  
22  
23  
24  
25  
26  
27  
28  
29  
30  
31  
32

33 Finally, when exploring the impact of psychosocial determinants and the gut microbiome on  
34 mental health, it is important to address sleep quality.<sup>27</sup> Asian Americans are more likely to report  
35 short sleep duration than their White peers (33% vs 28%).<sup>28</sup> Sleep disturbance is one of the most  
36 prominent symptoms experienced by those with depression and anxiety disorder, and is  
37 incorporated into the diagnostic criteria and definitions of these disorders.<sup>29-31</sup> Moreover, chronic  
38 stress frequently manifests as increases in sleep disturbance and/or changes in sleep patterns.<sup>32</sup>  
39  
40 Daily racial microaggressions have been associated with poorer sleep quality and shorter sleep  
41 duration the following day among Asian Americans.<sup>33</sup> Additionally, the gut microbiome has been  
42 associated with sleep disturbance and metabolic disorders.<sup>34 35</sup> Considered together, therefore, it is  
43 critical to examine psychosocial and biological pathways that might underlie depression, anxiety,  
44  
45  
46  
47  
48  
49  
50  
51  
52  
53  
54  
55  
56  
57  
58  
59  
60

## Psychosocial Factors, Gut Microbiome, &amp; Health in Asian Americans

and sleep disturbance in Asian Americans in the context of migration and acculturation among Asian immigrants in the U.S.

### Present Study

The goal of the present study (06/01/2020 – 05/31/2021) is to study psychosocial and biological mechanisms of depression, anxiety, and sleep disturbance to help inform early prevention and personalized treatment strategies for these conditions for Asian immigrants who commonly underutilize mental health services. Of many Asian subgroups, we chose to focus on Chinese and Korean as the target populations for two main reasons: (a) together, they represent the largest subgroup of Asian Americans in the U.S., as well as in the Greater Atlanta area where the study is located; and (b) as a result, they experience the greatest proportion of disease burden associated with depressive and anxiety disorders among Asian Americans. This work is guided by the conceptual framework presented in **Figure 1**. In conducting this research, we have two primary aims: (a) test the usability and feasibility of the study's multilingual survey measures and biospecimen collection procedures among Chinese and Korean immigrants living in the U.S.; and (b) collect pilot data for a subsequent larger study to examine the roles that psychosocial factors and the gut microbiome play in depression, anxiety, and sleep disturbance in this population.

## Method

### Study Design and Participants

An observational, cross-sectional study design will be used. The inclusion criteria for the sample population are: (1) aged 18 years or older; (2) self-identify as Chinese or Korean; (3) live in the greater Atlanta area in Georgia, U.S.; and (4) can read and write English, traditional and simplified Chinese, or Korean. Because this study aims to sample 1st and 2nd generation



## Psychosocial Factors, Gut Microbiome, & Health in Asian Americans

Chinese and Korean immigrants, we define 1st generation immigrants as those who are foreign-born living in the U.S., regardless of the duration and purpose of residence in the U.S., and we define 2nd generation immigrants as those who are U.S.-born living in the U.S. The exclusion criteria include having used antibiotics during the past month and being a pregnant woman, as they undergo considerable psychosocial and biological changes during pregnancy that can affect their physical and mental health status. We will sample a total of 60 participants, including 30 Chinese and 30 Korean. This is based on data showing that a sample size of 24-40 is optimal as a pilot study for helping inform subsequent research.<sup>36 37</sup>

### **Recruitment**

First, we will use both online and offline recruitment strategies. The former will involve posting study advertisements on social media (e.g., Twitter, Facebook), craigslist, ResearchMatch, and Chinese and Korean online communities (e.g., online Chinese Church Group via WeChat, Georgia Tech Korean Student Association), websites, and blogs. The latter recruitment strategy will involve working with community partners, including a Korean church in Atlanta, an Emory Clinic in Atlanta, and a local clinic in Johns Creek, Georgia. They will introduce our study to their Chinese or Korean congregation, patients, or members. This recruitment strategy is consistent with prior work showing that collaborating with gatekeepers is one of the most effective ways to reach and conduct high-quality research with Asian populations in the U.S.<sup>38</sup>

### **Patient and Public Involvement**

We have established an advisory board comprised of not only academics with expertise in immigrant populations and mental health, but also community members from churches and clinics. The demographic characteristics of the advisory board members are: (1) professor (male,

## Psychosocial Factors, Gut Microbiome, &amp; Health in Asian Americans

1  
2  
3 Caucasian, expertise: mental health), (2) professor (female, Caucasian, expertise: international  
4 social demography), (3) pastor (male, Korean), (4) professor/clinician #1 (male, Caucasian,  
5 medical doctor), and (5) clinical instructor/clinician #2 (female, Chinese, nurse practitioner). The  
6  
7  
8  
9  
10  
11  
12  
13  
14  
15  
16  
17  
18  
19  
20  
21  
22  
23  
24  
25  
26  
27  
28  
29  
30  
31  
32  
33  
34  
35  
36  
37  
38  
39  
40  
41  
42  
43  
44  
45  
46  
47  
48  
49  
50  
51  
52  
53  
54  
55  
56  
57  
58  
59  
60  
community members are Chinese or Korean themselves, or serve Chinese or Koreans in the  
Greater Atlanta area. The goal of the advisory board is to demonstrate and improve the research  
team's engagement with and accessibility to the target population. The board members in  
academia will share their knowledge and experience of working with racial/ethnic minority  
populations, and those in communities will provide the study's information and refer interested  
individuals to the research team. The board will convene as a group 1-2 times a year via  
conference calls, although the research team can contact individual board members for  
consultation as needed. The agenda of the advisory board meetings will include (but not be  
limited to) recruitment strategies to reach out to Chinese and Korean communities, motivational  
strategies, how each board member can help connect the communities to the research team, and  
the board's expectations after their service (e.g., authorship in papers, sharing the study findings  
with the community members they serve).

**Data Collection**

40  
41  
42  
43  
44  
45  
46  
47  
48  
49  
50  
51  
52  
53  
54  
55  
56  
57  
58  
59  
60  
First, when potential participants contact the research team directly or via referral, the  
research staff will email them back to make an appointment. Then, on the scheduled date and  
time, we will call them to screen their eligibility and obtain their verbal consent to participate in  
the study. To accomplish this, we have hired and trained culturally matched research staff  
members who are fluent in English, Chinese, or Korean to perform the consent process in the  
participant's preferred language. Due to the COVID-19 pandemic, there will not be any in-  
person interactions with participants. Second, upon obtaining participants' informed consent and

## Psychosocial Factors, Gut Microbiome, & Health in Asian Americans

1  
2  
3 agreement to participate in the study, the research team will send an online survey link via email.  
4  
5 Participants will administer the survey in their preferred language. During the survey,  
6  
7 participants will provide their name, mailing address, phone number, and email address.  
8  
9  
10 Participants' names and mailing addresses will be used to ship the gut microbiome data  
11  
12 collection kits, which will include pictorial and written instructions in English, Chinese, or  
13  
14 Korean. Compensation for participating will be provided after completing the study. The  
15  
16 compensation will be prorated: participants who complete both the online survey and specimen  
17  
18 collection will receive a \$30 e-gift card, whereas those completing only the online survey will  
19  
20 receive a \$10 e-gift card. E-gift cards will be emailed to the email addresses provided by the  
21  
22 participants.  
23  
24  
25

26 Consistent with ethical guidelines, participants will be allowed to opt-out of any parts of  
27  
28 the data collection that they wish (e.g., specific online survey questions, specimen collection)  
29  
30 and continue with other parts of the study protocol as they wish. If a participant does opt out,  
31  
32 they will be encouraged to provide a reason so we can better understand the situation. Their  
33  
34 feedback on the usability of the study methods will help the research team modify and tailor the  
35  
36 current data collection procedure further to Chinese and Korean immigrants for future research.  
37  
38 If participants withdraw their consent, or if the research team learns that a participant does not  
39  
40 meet the inclusion or exclusion criteria during the study, data collection will be stopped, and all  
41  
42 collected biological material and data will be destroyed.  
43  
44  
45

### **Self-report Measures and their Translation**

46  
47  
48  
49 This study will use the battery of validated instruments described in **Table 1**. The battery  
50  
51 will include the Demographics Short Form (DSF), Suinn-Lew Self Identity Acculturation Scale  
52  
53 (SL-ASIA), Acculturative Stress Scale, Subtle and Blatant Racism Scale for Asian Americans  
54  
55  
56  
57  
58  
59

## Psychosocial Factors, Gut Microbiome, &amp; Health in Asian Americans

(SABR-A<sup>2</sup>), Stress and Adversity Inventory for Adults (Adult STRAIN), Pandemic Stress Index (PSI), PROMIS Short Form – Depression, PROMIS Short Form–Anxiety, Pittsburgh Sleep Quality Index (PSQI), and PrimeScreen, a brief dietary screening tool. All these instruments have already been validated and are widely used in English.

**Table 1. Study Measures**

| Variable                              | Measure                                             | Instrument                                                                                          | Need for translation |
|---------------------------------------|-----------------------------------------------------|-----------------------------------------------------------------------------------------------------|----------------------|
| Sociodemographic and clinical factors |                                                     | Demographics Short Form (e.g., sociodemographic characteristics, health behaviors, medical history) | Y                    |
| Psychosocial factors                  | Acculturation                                       | Suinn-Lew Self Identity Acculturation Scale                                                         | Y                    |
|                                       |                                                     | Demographic Short Form (e.g., foreign-born status, duration of US residence, age at immigration)    | Y                    |
|                                       | Stress                                              | Stress and Adversity Inventory for Adults                                                           | Y                    |
|                                       |                                                     | Pandemic Stress Index                                                                               | Y                    |
|                                       |                                                     | Acculturative Stress Scale                                                                          | N                    |
|                                       | Subtle and Blatant Racism Scale for Asian Americans | Y                                                                                                   |                      |
|                                       | Diet                                                | PrimeScreen Survey                                                                                  | Y                    |
| Biological factor                     | Gut microbiome                                      | Fecal specimen                                                                                      | Y (instructions)     |
| Mental health outcomes                | Depression                                          | PROMIS Short Form–Depression                                                                        | N                    |
|                                       | Anxiety                                             | PROMIS Short Form–Anxiety                                                                           | N                    |
| Sleep symptoms                        | Sleep quality                                       | Pittsburgh Sleep Quality Index                                                                      | N                    |

For measures that have not yet been translated into Chinese and/or Korean, we contacted the instrument developers to obtain permission to use and translate them. We translated SABR-A<sup>2</sup>, Adult STRAIN, PSI, and PrimeScreen into Chinese and Korean following the guideline of cultural translation and adaptation of instruments from the World Health Organization, which involves: forward translation, expert panel back translation, pre-testing and cognitive interviewing, and final version.<sup>39</sup> Our instrument translation team included three research team members and one external member who were bilingual (fluent in English and Simplified or Traditional Chinese or Korean) with Ph.D. degrees in nursing or sociology and extensive

## Psychosocial Factors, Gut Microbiome, &amp; Health in Asian Americans

1  
2  
3 experience with Asian immigrants, demography, mental health, and stress. Specifically, after one  
4 member translated all of the instruments into Chinese or Korean versions, another member  
5 translated them back into English. Then, both members compared the original English and back-  
6 translated English versions to evaluate the quality of the translation. Discrepancies in the  
7 translation and meanings were solved by consensus discussions between these two members to  
8 ensure conceptual equivalence across the translations. The steps taken as part of this multi-  
9 lingual survey development process is depicted in **Figure 2**.

10  
11  
12  
13  
14  
15  
16  
17  
18  
19 **DSF.** The DSF is a 27-item questionnaire used to collect participants' general  
20 sociodemographic and health characteristics. Most of the items were derived from the National  
21 Institutes of Health (NIH) Common Data Elements.<sup>40</sup> The questionnaire has been used in an  
22 ongoing study sponsored by the NIH (1K99NR017897-01, PI: Bai). The sociodemographic  
23 variables include age, gender, self-identified race, marital status, living arrangement,  
24 immigration, religious belief, education, and household income. Health-related variables include  
25 height, weight, lactose intolerance, use of antibiotics and probiotics, disease history, and the use  
26 of mental health services.

27  
28  
29  
30  
31  
32  
33  
34  
35  
36  
37  
38 **SL-ASIA.** The original version<sup>41</sup> of the SL-ASIA is a 26-item questionnaire used to  
39 assess a person's level of acculturation, specifically historical background and cultural identity.  
40 We chose 5 items to measure participants' preference for food, music, custom, language  
41 proficiency, and the racial composition of close friends on a 5-point Likert scale. This adapted  
42 version has been used in other studies.<sup>42</sup> We will average the assigned values across the  
43 questions into a total acculturation score. A higher total score indicates more Westernization or  
44 acculturation.

## Psychosocial Factors, Gut Microbiome, &amp; Health in Asian Americans

1  
2  
3       ***Acculturative Stress Scale.*** The Acculturative Stress Scale is a 36-item questionnaire used  
4  
5 to measure acculturative stress on a 5-point Likert scale. Not counting the miscellaneous group,  
6  
7 there are six subscales assessing perceived discrimination, homesickness, perceived hate, fear,  
8  
9 stress due to change/culture shock, and guilt. In this study, an 8-item questionnaire from two  
10  
11 domains of task-oriented stress (3 items) and emotion-oriented stress (5 items) will be adopted.  
12  
13 Items for task-oriented stress include: “I feel nervous when communicating in English” and “I  
14  
15 feel uncomfortable adjusting to new foods.” Sample items for emotion-oriented stress include:  
16  
17 “Homesickness bothers me” and “I feel sad living in unfamiliar surroundings.” Acculturative  
18  
19 stress in the adapted instrument will also be measured on a 5-point Likert scale from 0 (*strongly*  
20  
21 *disagree*) to 4 (*strongly agree*). Individual scores will be summed to create a total score for each  
22  
23 domain where a task-oriented stress score can range 0–12, and an emotion-oriented stress score  
24  
25 can range 0–20. Higher scores indicate greater levels of acculturative stress. The adapted  
26  
27 instrument has shown high internal consistency for both scales tested among Korean American  
28  
29 older adults (Cronbach’s  $\alpha = .73$  for task-oriented stress and  $.87$  for emotion-oriented stress).<sup>43</sup>  
30  
31  
32  
33  
34

35       ***SABR-A<sup>2</sup>.*** The SABR-A is a 10-item questionnaire that asks about personal experience of  
36  
37 subtle and blatant racism.<sup>44</sup> The subtle racism subscale (4 items) refers to instances of  
38  
39 discrimination due implicitly to racial bias or stereotype (e.g., treated differently, overlooked).  
40  
41 The blatant racism subscale (4 items) refers to instances of discrimination due explicitly to racial  
42  
43 bias or stereotype (e.g., called names, commented about English proficiency). However, two out  
44  
45 of ten items were not included in this study because according to the instrument’s author, they  
46  
47 were developed as exploratory items. Responses are measured on a 5-point Likert scale from 1  
48  
49 (*almost never*) to 5 (*almost always*). All eight items will be averaged into a total racism score,  
50  
51  
52 and each set of the four items will be averaged into a subtle and blatant racism score, with higher  
53  
54  
55  
56  
57  
58  
59  
60

## Psychosocial Factors, Gut Microbiome, &amp; Health in Asian Americans

1  
2  
3 scores indicating greater perceived racism. The internal consistency of the total, subtle, and  
4  
5 blatant racism (sub)scales tested among self-identified Asian American undergraduate students  
6  
7 was 0.84-0.88, 0.76-0.82, and 0.77-0.82, respectively.<sup>44</sup>  
8  
9

10 **Adult STRAIN.** The Adult STRAIN<sup>45</sup> measures a person's lifetime exposure to 55  
11 different types of acute (e.g., deaths of relatives, job loss) and chronic stressors (e.g., persistent  
12 health, work, relationship, financial problems) (see <https://www.strainsetup.com>). Participants'  
13 responses will be used to calculate a standard set of 20 lifetime stress exposure scores, which are  
14 based on the type of stressors experienced, when they were experienced, their primary life  
15 domain, and their core social-psychological characteristic. More specifically, this summary score  
16 data will include the following computed variables: lifetime stressor count, lifetime stressor  
17 severity, early life (before age 18) stressor count, early life (before age 18) stressor severity,  
18 adulthood stressor count, adulthood stressor severity, lifetime count of acute life events, lifetime  
19 count of chronic difficulties, lifetime severity of acute life events, lifetime count of chronic  
20 difficulties, lifetime stressor count and severity by primary life domain (i.e., housing, education,  
21 work, treatment/health, marital/partner, reproduction, financial, legal/crime, other relationships,  
22 death, life-threatening situations, possessions), and lifetime stressor count and severity by core  
23 social-psychological characteristic (i.e., interpersonal loss, physical danger, humiliation,  
24 entrapment, role change/disruption). Higher scores indicate greater life stress exposure across  
25 these categories. The STRAIN has been extensively validated in relation to a variety of  
26 cognitive, mental, and physical health outcomes,<sup>46-50</sup> and has excellent test-retest reliability over  
27 time for the main stress exposure outcomes ( $r$ -values  $\geq 0.904$ ).<sup>45</sup>  
28  
29  
30  
31  
32  
33  
34  
35  
36  
37  
38  
39  
40  
41  
42  
43  
44  
45  
46  
47  
48  
49  
50

51 **PSI.** The PSI<sup>51</sup> is a 3-item measure of behavior changes and stress that individuals may  
52 have experienced during the COVID-19 pandemic. The questions are: "What are you doing/did  
53  
54  
55  
56  
57  
58  
59  
60

## Psychosocial Factors, Gut Microbiome, &amp; Health in Asian Americans

1  
2  
3 you do during COVID-19 (coronavirus)?" with a checklist of items about behaviors, like social  
4 distancing; "How much is/did COVID-19 (coronavirus) impact your day-to-day life?"; and  
5  
6 "Which of the following are you experiencing (or did you experience) during COVID-19  
7  
8 (coronavirus)?" with a checklist of items about emotional distress, substance use, sexual  
9  
10 behavior, financial stress, stigma, and support.  
11  
12  
13

14  
15 **PROMIS Short Form–Depression.** The 28-item PROMIS Depression Item Bank  
16 assesses negative mood (e.g., sadness, guilt), negative views of the self (e.g., self-criticism,  
17 worthlessness), negative social cognition (e.g., loneliness, interpersonal alienation), and  
18 decreased positive affect and engagement (e.g., loss of interest, meaning, and purpose).<sup>52</sup> Of  
19 these 28 items, 6 have been selected to create the PROMIS Short Form–Depression, which has  
20 high reliability and precision that is comparable to the original 28-item scale.<sup>52</sup> The 6-item scale  
21 assesses depressive symptoms over the past 7 days and has response options ranging from 1  
22 (*never*) to 5 (*always*). The raw scores will be transformed into *T* scores, with higher scores  
23 indicating more depressive symptoms.<sup>52</sup>  
24  
25  
26  
27  
28  
29  
30  
31  
32  
33  
34

35  
36 **PROMIS Short Form–Anxiety.** The PROMIS Anxiety Item Bank assesses self-reported  
37 fear, anxious misery, hyperarousal, and somatic symptoms related to arousal.<sup>53</sup> The PROMIS  
38 Short Form–Anxiety includes six items, which have reliability and precision estimates that are  
39 high and comparable to the full item bank.<sup>53</sup> The correlation of the adult full bank with the 6-  
40 item short form is between 0.90 and 0.95. The 6 items assess anxiety symptoms over the past 7  
41 days and have response options ranging from 1 (*never*) to 5 (*always*). The raw scores will be  
42 transformed into *T* scores, with higher scores indicating more severe anxiety.<sup>53</sup>  
43  
44  
45  
46  
47  
48  
49  
50

51  
52 **PSQI.** The PSQI is a 10-item scale including 19 self-rated questions. It assesses sleep  
53 quality over a one-month time interval. The instrument evaluates both objective (e.g., how often  
54  
55  
56  
57  
58  
59  
60



## Psychosocial Factors, Gut Microbiome, &amp; Health in Asian Americans

participants wake up during the night) and subjective aspects of sleep quality (e.g., how rested they typically feel after a night of sleep). These 19 questions are combined to form seven “component” scores, each of which has a range of 0-3 points, from 0 (*no difficulty*) to 3 (*severe difficulty*). Then, the seven component scores are summed to create a global PSQI score, ranging from 0-21, with higher scores indicating worse sleep quality. In primary insomnia patients, the overall PSQI global score exhibited an excellent test-retest reliability of .87.<sup>54</sup> The total score of the Korean version of PSQI showed high internal consistency (Cronbach's  $\alpha = 0.84$ ).<sup>55</sup>

**PrimeScreen.** The PrimeScreen is a 23-item dietary assessment questionnaire.<sup>56</sup> This self-reported measure evaluates the average frequency of consumption of specified foods and food groups, as well as 13 nutrients (e.g., vitamin and supplements) over the past six months.<sup>56 57</sup> Each item has five response categories: “less than once per week”, “once per week”, “2-4 times per week”, “nearly daily or daily”, or “twice or more per day”. This measure has great reliability and validity for use in adults aged 19-65 years, including excellent reproducibility ( $r = 0.70$ ) and comparability with the Semiquantitative Food Frequency Questionnaire (SFFQ) in foods and food groups ( $r = 0.61$ ), as well as excellent reproducibility ( $r = 0.74$ ) and comparability ( $r = 0.60$ ) with the SFFQ for nutrients.<sup>56</sup>

**Gut Microbiome**

To profile the gut microbiome, we will collect fecal specimens using the sample collection procedure used in the Human Microbiome Project protocol.<sup>58</sup> Specifically, we will coach participants to use the home-based specimen collection kits to obtain fecal samples. The kits will include one pair of gloves, one toilet basin, and one biohazard bag with four small stool collection tubes (Fisher Scientific Co. LLC., Pittsburgh, PA, USA). Fecal samples will be collected using pictorial instruction. Specifically, after voiding stool into the toilet basin, the

## Psychosocial Factors, Gut Microbiome, &amp; Health in Asian Americans

1  
2  
3 participant will use the spoon in the cap of the stool collection tube to collect stool and then cap  
4  
5 the tube. This stool specimen collection process is repeated two more times with the same voided  
6  
7 stool specimen for a total of three tubes (one for gut microbiome analysis, one for quality  
8  
9 control, and one for backup).

10  
11  
12 All the instructions for the sample collection will be prepared in English, Chinese, and  
13  
14 Korean. Upon completion of the specimen collection, participants will follow the packaging  
15  
16 instructions (e.g., store in a refrigerator for 24 hours before shipping). The samples will be put in  
17  
18 the biohazard bag and then into a padded, labeled freezer bag with an ice pack. Participants will  
19  
20 ship the samples to the Nursing Biobehavioral Laboratory at Emory University using pre-paid  
21  
22 FedEx shipping, which takes approximately 24 hours to arrive at the lab. All fecal samples will  
23  
24 be stored at a -80°C freezer until DNA extraction.

**DNA Extraction and Sequencing of the Gut Microbiome**

25  
26  
27  
28  
29  
30  
31 According to the Human Microbiome Project protocol, the microbial DNA will be  
32  
33 extracted from fecal specimens using the PowerSoil isolation kit (MO BIO Laboratories,  
34  
35 Carlsbad, CA, USA). The 16S rRNA V3-V4 gene regions<sup>59 60</sup> will be extracted and sequenced.  
36  
37 16S rRNA amplicons will be generated using KAPA HiFi HotStart ReadyMix (KAPA  
38  
39 Biosystems, KK2600) and primers specific to 16S V3-V4 region of bacteria 341F (5'-  
40  
41 CCTACGGGNGGCWGCAG-3')-805R (5'-GACTACHVGGGTATCTAATCC-3'). The PCR  
42  
43 clean-up will be performed using AMPure XP beads (Beckman, A63880) and indices will be  
44  
45 attached using the Nextera XT Index kit (Illumina, FC-131-1001). Final library pools will be  
46  
47 quantitated via qPCR (Kapa Biosystems, catalog KK4824). The pooled library will be sequenced  
48  
49 on an Illumina miSeq using miSeq v3 600 cycle chemistry (Illumina, catalog MS-102-3003) at a  
50  
51 loading density of 8 pM with 20% PhiX, at PE300 reads. This process will be conducted at the  
52  
53  
54  
55  
56  
57  
58  
59  
60

## Psychosocial Factors, Gut Microbiome, & Health in Asian Americans

Integrated Genomics Core at Emory University. The microbial sequencing will lead to paired-end sequences for further analysis.

### Statistical Analysis

Prior to analysis, all data will be reviewed for quality, distributions, and missing data bias (e.g., missing at random). Mathematical transformations will be performed when necessary to normalize scores. Descriptive statistics (e.g., Mann-Whitney U test and Fisher's exact test because of the limited sample size) will be adopted to describe participants' characteristics, as well as associations between the psychosocial and biological factors and the outcome variables (i.e., depression, anxiety, and sleep disturbance).

For the gut microbiome data, 16S rRNA sequences will be analyzed to obtain microbial diversity (i.e.,  $\alpha$ -diversity and  $\beta$ -diversity), taxonomic composition, and abundance analysis. QIIME 2™ default parameters will be used to identify amplicon sequence variants (ASVs) and filter the sequences quality using DADA2.<sup>61 62</sup> Taxonomies will be assigned by the pre-trained classifier using Silva. Differences between the microbiomes across samples will be characterized by  $\alpha$ -diversity metrics (Shannon, Chao-1, Faith's phylogenetic diversity, and Pielou's evenness) and  $\beta$ -diversity distances (Bray-Curtis distance, unweighted and weighted UniFrac distance). Pearson or Spearman correlations will be used to determine associations among microbial diversity indices ( $\alpha$ -diversity and  $\beta$ -diversity) and the outcome variables. The principal coordinates analysis (PCoA) will also be used to visualize diversity patterns. The linear discriminant analysis (LDA) effect size (LEfSe)<sup>63</sup> will be used to characterize the taxa differences between different levels of outcome variables: (a) Kruskal-Wallis sum-rank test will be adopted to detect features with significant differential abundance between the levels of outcome variables; (b) Wilcoxon rank-sum test will be adopted to further investigate

## Psychosocial Factors, Gut Microbiome, &amp; Health in Asian Americans

1  
2  
3 significances of taxa through a set of pairwise tests among subclasses (e.g., psychosocial  
4 factors); and (c) LEfSe will estimate the effect size of each differentially abundant feature. All  
5 analyses will be conducted using QIIME 2™<sup>64-66</sup> and R 3.3.3. The statistical significance level  
6 will be set at  $p < 0.05$ .  
7  
8  
9  
10

**Data Storage and Security**

11  
12  
13  
14 All of the survey data will be managed using REDCap,<sup>67</sup> which evaluates data errors,  
15 completeness, and validation checks to ensure maximum data quality. All fecal specimens will  
16 be stored in the Nursing Biobehavioral Laboratory at Emory University. These specimens will  
17 only be used to address our research aims. All the survey data and specimens will be destroyed  
18 three years after the entire study is finished. The confidentiality of all data will be maintained  
19 within legal limits.  
20  
21  
22  
23  
24  
25  
26  
27

**Discussion**

28  
29  
30  
31 Although numerous studies have examined risk processes associated with mental health  
32 and poor sleep, there is a distinct paucity of research on Asian immigrants in the U.S., despite the  
33 fact that this population is underserved and experiences substantial mental health-related disease  
34 burden in America. To address this important issue, we will conduct the present study, which  
35 will be the first to examine psychosocial and biological mechanisms underlying depression,  
36 anxiety, and sleep symptoms among Chinese and Korean immigrants in the U.S. Considering  
37 that these populations are growing quickly, we expect that the findings will help advance our  
38 knowledge on racial and ethnic differences in mental health outcomes and the biopsychosocial  
39 pathways that underlie these effects.  
40  
41  
42  
43  
44  
45  
46  
47  
48  
49  
50

51 Although these associations would be important to understand at any time, we believe  
52 these issues are particularly critical to study during the COVID-19 pandemic, given the increased  
53  
54  
55  
56  
57  
58  
59

## Psychosocial Factors, Gut Microbiome, &amp; Health in Asian Americans

1  
2  
3 rates of social conflict, discrimination, and, in some cases, injustice that have been experienced  
4  
5 by Asians in the U.S during this time. Indeed, the impact of the COVID-19 pandemic on Asian  
6  
7 immigrants has been extensive.<sup>68</sup> Public health measures designed to curb the spread of the virus,  
8  
9 which have included lockdown, school and business closures, and travel restrictions, have had a  
10  
11 tremendous impact on the stress levels and mental health of the general population.<sup>69 70</sup> Beyond  
12  
13 this, though, Asians living in the U.S. have been stigmatized and victimized by media coverage  
14  
15 perpetuating the naming of the COVID-19 virus as the ‘Chinese Virus’ or ‘Kung Flu’, which has  
16  
17 in turn lead to racial discrimination and other social threats<sup>68</sup> that have been shown to strongly  
18  
19 affect mental and physical health.<sup>71</sup> The cumulative social stress and threat experienced by Asian  
20  
21 immigrants, which include aggravated racial discrimination in addition to ongoing health,  
22  
23 employment, and financial worries, will provide a unique opportunity to better understand how  
24  
25 psychosocial factors and the microbiome affect mental health and sleep symptoms during a time  
26  
27 of maximal importance and relevance.  
28  
29  
30  
31  
32

33 In assessing Asian immigrants’ cumulative life stress exposure, the Adult STRAIN and  
34  
35 PSI will help assess acute and chronic stressors of participants who have been going through the  
36  
37 pandemic for an extended period of time. Importantly, some of the measures we have selected  
38  
39 are tailored to Asian populations, which will enable us to collect more valid and reliable data that  
40  
41 are reflective of Asians’ lived experiences, including racial discrimination and acculturation.  
42  
43 These culturally adapted measures will yield a unique and timely perspective on mental health  
44  
45 and sleep outcomes in Asian immigrants.  
46  
47  
48

49 This study has some limitations. They include a limited sample size and cross-sectional  
50  
51 study design. The small sample size limits power and data analysis options at the more granular  
52  
53 level (e.g., stratified analysis by immigrant generation). Also, the sample limits generalizability  
54  
55  
56  
57  
58  
59  
60

## Psychosocial Factors, Gut Microbiome, &amp; Health in Asian Americans

1  
2  
3 to other Asian subgroups due to studying only Chinese and Koreans. In terms of the measures,  
4  
5 although diet is culture-specific, the PrimeScreen has not been extensively validated among  
6  
7 Chinese or Korean populations. Despite some dietary intake not captured by the PrimeScreen,  
8  
9 we expect its impact on the study findings to be minimal, as diet will be treated as a control  
10  
11 variable in analyses. Lastly, the demographic characteristics may differ between those recruited  
12  
13 online and offline. Considering many of the recruitment strategies use online platforms, the  
14  
15 participants could be skewed toward a younger population with a shorter duration of U.S.  
16  
17 residence, resulting in limited variation for these data. Therefore, a future study should collect  
18  
19 information on how participants were recruited (online vs. offline) and consider this in statistical  
20  
21 analyses. Nevertheless, looking forward, we expect this study to provide important preliminary  
22  
23 data that can in turn be used to inform the development of a larger longitudinal study aimed at  
24  
25 investigating associations between psychosocial and biological determinants of health, and  
26  
27 mental health and sleep symptoms among Asian immigrants in the U.S.  
28  
29  
30  
31  
32  
33  
34  
35  
36  
37  
38  
39  
40  
41  
42  
43  
44  
45  
46  
47  
48  
49  
50  
51  
52  
53  
54  
55  
56  
57  
58  
59  
60

## Psychosocial Factors, Gut Microbiome, &amp; Health in Asian Americans

**Acknowledgements**

The authors thank Daesung Choi for assisting the translation of survey instruments, Rema Henry for helping build the online survey, and the advisory board members Kevin Park, Brooke Yang, and Kathryn Yount for their feedback and support to recruit our target populations.

**Author's contributions**

The study's concept and design were conceived by SK, WZ, VP, VSH, and JB. GMS produced a secure online STRAIN portal, monitored stress data collection, and implemented and managed the stress data collection protocol. SK, WZ, and JB translated the survey instruments and other study materials into Chinese or Korean. SK, WZ, JKA, JB, and CMS developed the online survey and managed the online survey platforms. SK, WZ, VP, JKA, and JB were involved in participant recruitment. SK, WZ, JKA, and JB collected data and consented participants. SK, WZ, JKA, and JB will analyze the data, and VSH and GMS will guide and supervise data analysis. SK prepared the first draft of this manuscript. All authors provided critical edits, critiqued the manuscript for intellectual content, and read and approved the final version for submission.

**Funding statement**

This work was supported by the Office of the Senior Vice President for Research at Emory University (Bidirectional Global Health Disparities Research Pilot Grant, JB and SK) and National Institute of Health/National Institute of Nursing Research (1K99NR017897-01, 4R00NR017897-03, JB). GMS was supported by a Society in Science—Branco Weiss Fellowship, NARSAD Young Investigator Grant #23958 from the Brain & Behavior Research Foundation, and National Institutes of Health grant K08 MH103443.

**Ethics approval**

Psychosocial Factors, Gut Microbiome, & Health in Asian Americans

This study was approved by the Institutional Review Board at Emory University (IRB ID: STUDY00000935).

**Competing interest statement**

None declared.

For peer review only



## Psychosocial Factors, Gut Microbiome, &amp; Health in Asian Americans

## References

1. Pew Research Center. Key facts about Asian origin groups in the U.S. 2019 [Available from: <https://www.pewresearch.org/fact-tank/2019/05/22/key-facts-about-asian-origin-groups-in-the-u-s/> accessed November, 8 2019.
2. Islam NS, Khan S, Kwon S, et al. Methodological issues in the collection, analysis, and reporting of granular data in Asian American populations: historical challenges and potential solutions. *J Health Care Poor Underserved* 2010;21(4):1354-81. doi: 10.1353/hpu.2010.0939
3. Kim HJ, Park E, Storr CL, et al. Depression among Asian-American Adults in the Community: Systematic Review and Meta-Analysis. *PLoS One* 2015;10(6):e0127760. doi: 10.1371/journal.pone.0127760 [published Online First: 2015/06/02]
4. Hong S, Walton E, Tamaki E, et al. Lifetime Prevalence of Mental Disorders among Asian Americans: Nativity, Gender, and Sociodemographic Correlates. *Asian Am J Psychol* 2014;5(4):353-63. doi: 10.1037/a0035680 [published Online First: 2015/01/27]
5. Sansone RA, Sansone LA. Psychiatric disorders: a global look at facts and figures. *Psychiatry (Edgmont)* 2010;7(12):16-9. [published Online First: 2011/01/29]
6. Clarke T, Schiller J, Boersma P. Early Release of Selected Estimates Based on Data From the 2019 National Health Interview Survey: Division of Health Interview Statistics, National Center for Health Statistics; 2020 [Available from: <https://www.cdc.gov/nchs/data/nhis/earlyrelease/EarlyRelease202009-508.pdf> accessed November 18 2020.

## Psychosocial Factors, Gut Microbiome, &amp; Health in Asian Americans

- 1  
2  
3 7. Williams NJ, Grandner MA, Wallace DM, et al. Social and behavioral predictors of  
4  
5 insufficient sleep among African Americans and Caucasians. *Sleep Med* 2016;18:103-7.  
6  
7 doi: 10.1016/j.sleep.2015.02.533 [published Online First: 2015/10/31]  
8  
9
- 10 8. Slavich GM, Irwin MR. From stress to inflammation and major depressive disorder: a social  
11  
12 signal transduction theory of depression. *Psychol Bull* 2014;140(3):774-815. doi:  
13  
14 10.1037/a0035302 [published Online First: 2014/01/15]  
15  
16
- 17 9. Slavich GM. Psychoneuroimmunology of stress and mental health. In: Harkness KL, Hayden  
18  
19 EP, eds. *The Oxford handbook of stress and mental health* New York: Oxford University  
20  
21 Press 2020:519-46.  
22  
23
- 24 10. Centers for Disease Control and Prevention. National Center for Injury Prevention and  
25  
26 Control. Web Based Injury Statistics Query and Reporting System (WISQARS) 2016  
27  
28 [Available from: <http://www.cdc.gov/injury/wisqars/index.html> accessed October 27  
29  
30 2019.  
31  
32
- 33 11. Yip T, Gee GC, Takeuchi DT. Racial discrimination and psychological distress: the impact  
34  
35 of ethnic identity and age among immigrant and United States-born Asian adults. *Dev*  
36  
37 *Psychol* 2008;44(3):787-800. doi: 10.1037/0012-1649.44.3.787 [published Online First:  
38  
39 2008/05/14]  
40  
41
- 42 12. Gee GC, Spencer M, Chen J, et al. The association between self-reported racial  
43  
44 discrimination and 12-month DSM-IV mental disorders among Asian Americans  
45  
46 nationwide. *Soc Sci Med* 2007;64(10):1984-96. doi: 10.1016/j.socscimed.2007.02.013  
47  
48 [published Online First: 2007/03/22]  
49  
50  
51  
52  
53  
54  
55  
56  
57  
58  
59  
60

## Psychosocial Factors, Gut Microbiome, &amp; Health in Asian Americans

- 1  
2  
3  
4  
5  
6  
7  
8  
9  
10  
11  
12  
13  
14  
15  
16  
17  
18  
19  
20  
21  
22  
23  
24  
25  
26  
27  
28  
29  
30  
31  
32  
33  
34  
35  
36  
37  
38  
39  
40  
41  
42  
43  
44  
45  
46  
47  
48  
49  
50  
51  
52  
53  
54  
55  
56  
57  
58  
59  
60
13. Lee RM. Resilience Against Discrimination: Ethnic Identity and Other-Group Orientation as Protective Factors for Korean Americans. *Journal of Counseling Psychology* 2005;52(1):36-44. doi: 10.1037/0022-0167.52.1.36
  14. Banks KH, Kohn-Wood LP, Spencer M. An examination of the African American experience of everyday discrimination and symptoms of psychological distress. *Community Ment Health J* 2006;42(6):555-70. doi: 10.1007/s10597-006-9052-9 [published Online First: 2006/08/10]
  15. American Psychological Association Working Group on Stress and Health Disparities. Stress and health disparities: Contexts, mechanisms, and interventions among racial/ethnic minority and low-socioeconomic status populations 2017 [Available from: <http://www.apa.org/pi/health-disparities/resources/stress-report.aspx> accessed October 2 2020.
  16. Ruiz NG, Horowitz JM, Tamir C. Many Black and Asian Americans Say They Have Experienced Discrimination Amid the COVID-19 Outbreak: Pew Research Center,; 2020 [Available from: <https://www.pewsocialtrends.org/2020/07/01/many-black-and-asian-americans-say-they-have-experienced-discrimination-amid-the-covid-19-outbreak/> accessed October 2 2020.
  17. Nagayama Hall GC, Yee A. U.S. Mental Health Policy: Addressing the Neglect of Asian Americans. *Asian Am J Psychol* 2012;3(3):181-93. doi: 10.1037/a0029950 [published Online First: 2012/09/01]
  18. Hacimusalar Y, Eşel E. Suggested Biomarkers for Major Depressive Disorder. *Noro Psikiyatir Ars* 2018;55(3):280-90. doi: 10.5152/npa.2017.19482 [published Online First: 2018/09/19]

## Psychosocial Factors, Gut Microbiome, &amp; Health in Asian Americans

- 1  
2  
3 19. Rhee SH, Pothoulakis C, Mayer EA. Principles and clinical implications of the brain-gut-  
4  
5 enteric microbiota axis. *Nat Rev Gastroenterol Hepatol* 2009;6(5):306-14. doi:  
6  
7 10.1038/nrgastro.2009.35 [published Online First: 2009/05/01]  
8  
9
- 10 20. Cryan JF, Dinan TG. Mind-altering microorganisms: the impact of the gut microbiota on  
11  
12 brain and behaviour. *Nature Reviews Neuroscience* 2012;13(10):701-12. doi:  
13  
14 10.1038/nrn3346  
15
- 16 21. Savage DC. Microbial ecology of the gastrointestinal tract. *Annu Rev Microbiol*  
17  
18 1977;31:107-33. doi: 10.1146/annurev.mi.31.100177.000543 [published Online First:  
19  
20 1977/01/01]  
21  
22
- 23 22. Knight R, Buhler B. Follow Your Gut: The Enormous Impact of Tiny Microbes. New York,  
24  
25 NY: Simon & Schuster 2015.  
26  
27
- 28 23. Vangay P, Johnson AJ, Ward TL, et al. US Immigration Westernizes the Human Gut  
29  
30 Microbiome. *Cell* 2018;175(4):962-72.e10. doi: 10.1016/j.cell.2018.10.029 [published  
31  
32 Online First: 2018/11/06]  
33  
34
- 35 24. Kaplan RC, Wang Z, Usyk M, et al. Gut microbiome composition in the Hispanic  
36  
37 Community Health Study/Study of Latinos is shaped by geographic relocation,  
38  
39 environmental factors, and obesity. *Genome Biology* 2019;20(1):219. doi:  
40  
41 10.1186/s13059-019-1831-z  
42  
43
- 44 25. Montiel-Castro A, González-Cervantes R, Bravo-Ruiseco G, et al. The microbiota-gut-brain  
45  
46 axis: neurobehavioral correlates, health and sociality. *Frontiers in Integrative*  
47  
48 *Neuroscience* 2013;7(70) doi: 10.3389/fnint.2013.00070  
49  
50
- 51 26. Strasser B, Becker K, Fuchs D, et al. Kynurenine pathway metabolism and immune  
52  
53 activation: Peripheral measurements in psychiatric and co-morbid conditions.  
54  
55  
56  
57  
58  
59

## Psychosocial Factors, Gut Microbiome, &amp; Health in Asian Americans

- 1  
2  
3 *Neuropharmacology* 2017;112(Pt B):286-96. doi: 10.1016/j.neuropharm.2016.02.030  
4  
5 [published Online First: 2016/03/01]  
6  
7  
8 27. Cashion AK, Gill J, Hawes R, et al. National Institutes of Health Symptom Science Model  
9  
10 sheds light on patient symptoms. *Nurs Outlook* 2016;64(5):499-506. doi:  
11  
12 10.1016/j.outlook.2016.05.008 [published Online First: 2016/06/29]  
13  
14  
15 28. Jackson CL, Kawachi I, Redline S, et al. Asian-White disparities in short sleep duration by  
16  
17 industry of employment and occupation in the US: a cross-sectional study. *BMC Public*  
18  
19 *Health* 2014;14:552. doi: 10.1186/1471-2458-14-552 [published Online First:  
20  
21 2014/06/05]  
22  
23  
24 29. Rumble ME, White KH, Benca RM. Sleep Disturbances in Mood Disorders. *Psychiatr Clin*  
25  
26 *North Am* 2015;38(4):743-59. doi: 10.1016/j.psc.2015.07.006 [published Online First:  
27  
28 2015/11/26]  
29  
30  
31 30. Murphy MJ, Peterson MJ. Sleep Disturbances in Depression. *Sleep Med Clin* 2015;10(1):17-  
32  
33 23. doi: 10.1016/j.jsmc.2014.11.009 [published Online First: 2015/06/10]  
34  
35  
36 31. Cox RC, Olatunji BO. A systematic review of sleep disturbance in anxiety and related  
37  
38 disorders. *J Anxiety Disord* 2016;37:104-29. doi: 10.1016/j.janxdis.2015.12.001  
39  
40 [published Online First: 2016/01/09]  
41  
42  
43 32. NPR/Robert Wood Johnson Foundation/Harvard School of Public Health. The Burden of  
44  
45 Stress in America 2014 [Available from:  
46  
47 [https://media.npr.org/documents/2014/july/npr\\_rwfj\\_harvard\\_stress\\_poll.pdf](https://media.npr.org/documents/2014/july/npr_rwfj_harvard_stress_poll.pdf) accessed  
48  
49 Octobeer 2 2020.  
50  
51  
52  
53  
54  
55  
56  
57  
58  
59  
60

## Psychosocial Factors, Gut Microbiome, &amp; Health in Asian Americans

- 1  
2  
3 33. Ong AD, Cerrada C, Lee RA, et al. Stigma consciousness, racial microaggressions, and sleep  
4  
5 disturbance among Asian Americans. *Asian American Journal of Psychology*  
6  
7 2017;8(1):72-81. doi: 10.1037/aap0000062  
8  
9
- 10 34. Karlsson B, Knutsson A, Lindahl B. Is there an association between shift work and having a  
11  
12 metabolic syndrome? Results from a population based study of 27,485 people. *Occup*  
13  
14 *Environ Med* 2001;58(11):747-52. doi: 10.1136/oem.58.11.747  
15  
16
- 17 35. Turek FW, Joshu C, Kohsaka A, et al. Obesity and metabolic syndrome in circadian Clock  
18  
19 mutant mice. *Science* 2005;308(5724):1043-5. doi: 10.1126/science.1108750 [published  
20  
21 Online First: 2005/04/23]  
22  
23
- 24 36. Julious SA. Sample size of 12 per group rule of thumb for a pilot study. *Pharmaceutical*  
25  
26 *Statistics: The Journal of Applied Statistics in the Pharmaceutical Industry*  
27  
28 2005;4(4):287-91.  
29  
30
- 31 37. Kieser M, Wassmer G. On the use of the upper confidence limit for the variance from a pilot  
32  
33 sample for sample size determination. *Biometrical journal* 1996;38(8):941-49.  
34  
35
- 36 38. Im EO, Kim S, Xu S, et al. Issues in Recruiting and Retaining Asian American Breast Cancer  
37  
38 Survivors in a Technology-Based Intervention Study. *Cancer Nurs* 2020;43(1):E22-e29.  
39  
40 doi: 10.1097/ncc.0000000000000657 [published Online First: 2018/10/23]  
41  
42
- 43 39. World Health Organization. Process of translation and adaptation of instruments 2020  
44  
45 [Available from: [https://www.who.int/substance\\_abuse/research\\_tools/translation/en/](https://www.who.int/substance_abuse/research_tools/translation/en/)  
46  
47 accessed August 25 2020.  
48
- 49 40. National Library of Medicine. NIH CDE Repository Bethesda, MD: National Library of  
50  
51 Medicine; [Available from: <https://cde.nlm.nih.gov/cde/search> accessed April 7 2021.  
52  
53  
54  
55  
56  
57  
58  
59  
60

## Psychosocial Factors, Gut Microbiome, &amp; Health in Asian Americans

- 1  
2  
3  
4  
5  
6  
7  
8  
9  
10  
11  
12  
13  
14  
15  
16  
17  
18  
19  
20  
21  
22  
23  
24  
25  
26  
27  
28  
29  
30  
31  
32  
33  
34  
35  
36  
37  
38  
39  
40  
41  
42  
43  
44  
45  
46  
47  
48  
49  
50  
51  
52  
53  
54  
55  
56  
57  
58  
59  
60
41. Suinn RM, Ahuna C, Khoo G. The Suinn-Lew Asian Self-Identity Acculturation Scale: Concurrent and factorial validation. *Educational and Psychological Measurement* 1992;52(4):1041-46. doi: 10.1177/0013164492052004028
42. Im EO, Kim S, Ji X, et al. Improving menopausal symptoms through promoting physical activity: a pilot Web-based intervention study among Asian Americans. *Menopause* 2017;24(6):653-62. doi: 10.1097/gme.0000000000000825 [published Online First: 2017/01/25]
43. Jang Y, Chiriboga DA. Living in a Different World: Acculturative Stress Among Korean American Elders. *The Journals of Gerontology: Series B* 2010;65B(1):14-21. doi: 10.1093/geronb/gbp019
44. Yoo HC, Steger MF, Lee RM. Validation of the subtle and blatant racism scale for Asian American college students (SABR-A<sup>2</sup>). *Cultural Diversity and Ethnic Minority Psychology* 2010;16(3):323-34. doi: 10.1037/a0018674
45. Slavich GM, Shields GS. Assessing Lifetime Stress Exposure Using the Stress and Adversity Inventory for Adults (Adult STRAIN): An Overview and Initial Validation. *Psychosomatic medicine* 2018;80(1):17-27. doi: 10.1097/PSY.0000000000000534
46. Sturmbauer SC, Shields GS, Hetzel EL, et al. The Stress and Adversity Inventory for Adults (Adult STRAIN) in German: An overview and initial validation. *PLoS One* 2019;14(5):e0216419. doi: 10.1371/journal.pone.0216419 [published Online First: 2019/05/10]
47. Cazassa MJ, Oliveira MdS, Spahr CM, et al. The Stress and Adversity Inventory for Adults (Adult STRAIN) in Brazilian Portuguese: Initial validation and links with executive function, sleep, and mental and physical health. *Frontiers in Psychology* 2020;10:3083.

## Psychosocial Factors, Gut Microbiome, &amp; Health in Asian Americans

- 1  
2  
3 48. Banica I, Sandre A, Shields GS, et al. The error-related negativity (ERN) moderates the  
4  
5 association between interpersonal stress and anxiety symptoms six months later.  
6  
7 *International Journal of Psychophysiology* 2020;153:27-36.  
8  
9
- 10 49. Smith T, Johns-Wolfe E, Shields GS, et al. Associations between lifetime stress exposure and  
11  
12 prenatal health behaviors. *Stress and Health* 2020;36(3):384-95.  
13  
14
- 15 50. McLoughlin E, Fletcher D, Slavich GM, et al. Cumulative lifetime stress exposure,  
16  
17 depression, anxiety, and well-being in elite athletes: A mixed-method study. *Psychology*  
18  
19 *of sport and exercise* 2021;52:101823.  
20  
21
- 22 51. Harkness A, Behar-Zusman V, Safren SA. Understanding the Impact of COVID-19 on  
23  
24 Latino Sexual Minority Men in a US HIV Hot Spot. *AIDS and Behavior*  
25  
26 2020;24(7):2017-23. doi: 10.1007/s10461-020-02862-w  
27
- 28 52. Patient-Reported Outcomes Measurement Information System. DEPRESSION: A brief guide  
29  
30 to the PROMIS© Depression instruments 2019 [updated February 28, 2019. Available  
31  
32 from: <https://www.healthmeasures.net/search-view-measures?task=Search.search>  
33  
34 accessed September 22 2020.  
35  
36
- 37 53. Patient-Reported Outcomes Measurement Information System. ANXIETY: A brief guide to  
38  
39 the PROMIS© Anxiety instruments 2019 [updated March 1, 2019. Available from:  
40  
41 <https://www.healthmeasures.net/search-view-measures?task=Search.search> accessed  
42  
43 September 24 2020.  
44  
45
- 46 54. Backhaus J, Junghanns K, Broocks A, et al. Test-retest reliability and validity of the  
47  
48 Pittsburgh Sleep Quality Index in primary insomnia. *J Psychosom Res* 2002;53(3):737-  
49  
50 40. doi: 10.1016/s0022-3999(02)00330-6 [published Online First: 2002/09/10]  
51  
52  
53  
54  
55  
56  
57  
58  
59  
60



## Psychosocial Factors, Gut Microbiome, &amp; Health in Asian Americans

- 1  
2  
3 55. Sohn SI, Kim DH, Lee MY, et al. The reliability and validity of the Korean version of the  
4  
5 Pittsburgh Sleep Quality Index. *Sleep Breath* 2012;16(3):803-12. doi: 10.1007/s11325-  
6  
7 011-0579-9 [published Online First: 2011/09/09]  
8  
9
- 10 56. Rifas-Shiman SL, Willett WC, Lobb R, et al. PrimeScreen, a brief dietary screening tool:  
11  
12 reproducibility and comparability with both a longer food frequency questionnaire and  
13  
14 biomarkers. *Public Health Nutr* 2001;4(2):249-54. doi: 10.1079/phn200061 [published  
15  
16 Online First: 2001/04/12]  
17  
18
- 19 57. Sun S, Lulla A, Sioda M, et al. Gut Microbiota Composition and Blood Pressure.  
20  
21 *Hypertension* 2019;73(5):998-1006. doi: 10.1161/hypertensionaha.118.12109 [published  
22  
23 Online First: 2019/03/25]  
24  
25
- 26 58. Methé BA, Nelson KE, Pop M, et al. A framework for human microbiome research. *Nature*  
27  
28 2012;486(7402):215-21. doi: 10.1038/nature11209  
29  
30
- 31 59. Chen Z, Hui PC, Hui M, et al. Impact of Preservation Method and 16S rRNA Hypervariable  
32  
33 Region on Gut Microbiota Profiling. *mSystems* 2019;4(1):e00271-18. doi:  
34  
35 10.1128/mSystems.00271-18  
36  
37
- 38 60. Bukin YS, Galachyants YP, Morozov IV, et al. The effect of 16S rRNA region choice on  
39  
40 bacterial community metabarcoding results. *Scientific Data* 2019;6(1):190007. doi:  
41  
42 10.1038/sdata.2019.7  
43  
44
- 45 61. Callahan BJ, McMurdie PJ, Rosen MJ, et al. DADA2: High-resolution sample inference  
46  
47 from Illumina amplicon data. *Nat Methods* 2016;13(7):581-3. [published Online First:  
48  
49 2016/05/24]  
50  
51  
52  
53  
54  
55  
56  
57  
58  
59  
60

## Psychosocial Factors, Gut Microbiome, &amp; Health in Asian Americans

- 1  
2  
3 62. Callahan BJ, McMurdie PJ, Holmes SP. Exact sequence variants should replace operational  
4 taxonomic units in marker-gene data analysis. *International Society for Microbial*  
5 *Ecology Journal* 2017;11(12):2639-43. doi: 10.1038/ismej.2017.119  
6  
7  
8  
9  
10 63. Segata N, Izard J, Waldron L, et al. Metagenomic biomarker discovery and explanation.  
11 *Genome biology* 2011;12(6):R60-R60. doi: 10.1186/gb-2011-12-6-r60  
12  
13  
14 64. Bolyen E, Rideout JR, Dillon MR, et al. Reproducible, interactive, scalable and extensible  
15 microbiome data science using QIIME 2. *Nature Biotechnology* 2019;37(8):852-57. doi:  
16 10.1038/s41587-019-0209-9  
17  
18  
19  
20  
21 65. Bai J, Jhaney I, Daniel G, et al. Pilot Study of Vaginal Microbiome Using QIIME 2™ in  
22 Women With Gynecologic Cancer Before and After Radiation Therapy. *Oncology*  
23 *nursing forum* 2019;46(2):E48-e59. doi: 10.1188/19.Onf.E48-e59 [published Online  
24 First: 2019/02/16]  
25  
26  
27  
28  
29  
30 66. Bai J, Jhaney I, Wells J. Developing a Reproducible Microbiome Data Analysis Pipeline  
31 Using the Amazon Web Services Cloud for a Cancer Research Group: Proof-of-Concept  
32 Study. *JMIR medical informatics* 2019;7(4):e14667-e67. doi: 10.2196/14667  
33  
34  
35  
36  
37 67. Harris PA, Taylor R, Thielke R, et al. Research electronic data capture (REDCap) - A  
38 metadata-driven methodology and workflow process for providing translational research  
39 informatics support. *J Biomed Inform* 2009;42(2):377-81.  
40  
41  
42  
43  
44 68. Aqua JK. Hiding Behind a Mask: Perspectives from an Asian American Epidemiologist.  
45 *Epidemiology* 2020;Publish Ahead of Print doi: 10.1097/ede.0000000000001282  
46  
47  
48  
49 69. Czeisler MÉ, Lane RI, Petrosky E, et al. Mental health, substance use, and suicidal ideation  
50 during the COVID-19 pandemic—United States, June 24–30, 2020. *Morbidity and*  
51 *Mortality Weekly Report* 2020;69(32):1049.  
52  
53  
54  
55  
56  
57  
58  
59  
60

## Psychosocial Factors, Gut Microbiome, &amp; Health in Asian Americans

- 1  
2  
3 70. Dedoncker J, Vanderhasselt MA, Ottaviani C, et al. Mental health during the COVID-19  
4  
5 pandemic and beyond: The importance of the vagus nerve for biopsychosocial resilience.  
6  
7 *Neurosci Biobehav Rev* 2021;125:1-10. doi: 10.1016/j.neubiorev.2021.02.010 [published  
8  
9 Online First: 2021/02/15]  
10  
11  
12 71. Slavich GM. Social Safety Theory: A Biologically Based Evolutionary Perspective on Life  
13  
14 Stress, Health, and Behavior. *Annual Review of Clinical Psychology* 2020;16(1):265-95.  
15  
16 doi: 10.1146/annurev-clinpsy-032816-045159  
17  
18  
19  
20  
21  
22  
23  
24  
25  
26  
27  
28  
29  
30  
31  
32  
33  
34  
35  
36  
37  
38  
39  
40  
41  
42  
43  
44  
45  
46  
47  
48  
49  
50  
51  
52  
53  
54  
55  
56  
57  
58  
59  
60

1  
2  
3 **Figure legends**

4  
5 Figure 1. Conceptual Framework

6  
7 Figure 2. Multi-lingual Survey Development and Testing Process

8  
9  
10  
11  
12  
13  
14  
15  
16  
17  
18  
19  
20  
21  
22  
23  
24  
25  
26  
27  
28  
29  
30  
31  
32  
33  
34  
35  
36  
37  
38  
39  
40  
41  
42  
43  
44  
45  
46  
47  
48  
49  
50  
51  
52  
53  
54  
55  
56  
57  
58  
59  
60

For peer review only



Figure 1

165x160mm (72 x 72 DPI)

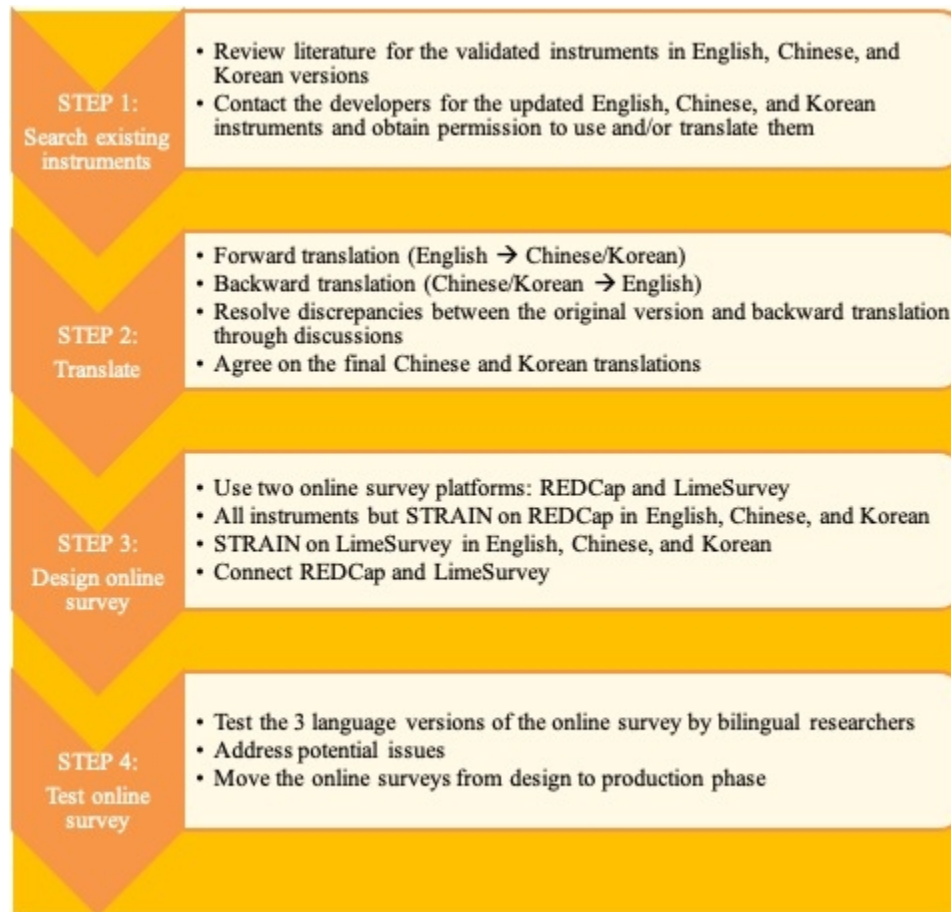

Figure 2

170x160mm (72 x 72 DPI)
